# Supplementary material for: Risks and benefits of direct oral anticoagulants versus warfarin in a real world setting: cohort study in primary care
Source: PubMed Central journal article supplement (PMC6031213; doi:10.1136/bmj.k2505), 2018-07-04
Supplement: viny041857.ww1.pdf [file viny041857.ww1.pdf]

Re: Risk and benefits of direct oral anticoagulants versus warfarin in real world setting: cohort studies using two primary care databases

## Supplementary data

### Content

|                                                                                                                                                                                                                                                     |    |
|-----------------------------------------------------------------------------------------------------------------------------------------------------------------------------------------------------------------------------------------------------|----|
| eTable 1 ICD-10 codes for the outcomes.....                                                                                                                                                                                                         | 2  |
| eTable 2 Supplementary data for Figure2: Number of patients starting anticoagulants by study year 2                                                                                                                                                 |    |
| eTable 3 <b>Patients with atrial fibrillation</b> : Characteristics of patients in the QResearch and CPRD cohorts, percentage (numbers). .....                                                                                                      | 3  |
| eTable 4 <b>Patients without atrial fibrillation</b> : Characteristics of patients in the QResearch and CPRD cohorts, percentage (numbers). .....                                                                                                   | 5  |
| eTable 5 <b>All patients</b> : Rates per 1000py of outcomes by drug and adjusted hazard ratios with reference to warfarin in QResearch and CPRD .....                                                                                               | 7  |
| eTable 6 <b>Patients with and without atrial fibrillation</b> : Adjusted hazard ratios (95% CI) for outcomes associated with exposure to study drugs compared with warfarin, by database .....                                                      | 9  |
| eTable 7 <b>Patients with and without atrial fibrillation</b> : Adjusted hazard ratios (95% CI) for outcomes associated with exposure to study drugs compared with <b>apixaban</b> , by database .....                                              | 11 |
| eTable 8 Cause of death by drug and database, proportion of deceased patients on the drug.....                                                                                                                                                      | 13 |
| eTable 9 <b>Patients with and without atrial fibrillation</b> : Cohort characteristics by database, percentage (number) of patients on lower and higher doses for DOAC's .....                                                                      | 14 |
| eTable 10 <b>Patients with and without atrial fibrillation</b> : Comorbidities, previous events and other medications, percentage (number) of patients on lower and higher doses for DOAC's.....                                                    | 16 |
| eTable 11 <b>Patients with atrial fibrillation</b> : Rates per 1000py of outcomes by drug and dose for DOAC's and adjusted hazard ratios with reference to <b>warfarin</b> in QResearch and CPRD .....                                              | 18 |
| eTable 12 <b>Patients without atrial fibrillation</b> : Rates per 1000py of outcomes by drug and dose for DOAC's and adjusted hazard ratios with reference to <b>warfarin</b> in QResearch and CPRD .....                                           | 20 |
| eTable 13 <b>All patients</b> : Rates per 1000py of outcomes by drug and dose for DOAC's and adjusted hazard ratios with reference to warfarin in QResearch and CPRD .....                                                                          | 22 |
| eTable 14 <b>All patients</b> : Sensitivity analysis, censoring patients at the time of hospitalisation related to other outcome. Adjusted hazard ratios (95% CI) for outcomes associated with exposure to study drugs compared with warfarin. .... | 25 |
| eTable 15 <b>All patients</b> : Complete case analysis and propensity score adjustment by database. Adjusted hazard ratios (95% CI) for outcomes associated with exposure to study drugs compared with warfarin.....                                | 26 |

eTable 1 ICD-10 codes for the outcomes

| outcome                | ICD10-code                                                                                                                                                                               |
|------------------------|------------------------------------------------------------------------------------------------------------------------------------------------------------------------------------------|
| Intracranial bleed     | I60, I600, I601, I602, I603, I604, I605, I606, I607, I608, I609, I61, I610, I611, I612, I613, I614, I615, I616, I618, I619, I62, I620, I621, I629, S065, S066                            |
| Haematuria             | R31, R31X                                                                                                                                                                                |
| Haemoptysis            | R04, R041, R042, R048, R049                                                                                                                                                              |
| Upper GI bleed         | I850, K226, K250, K251, K252, K254, K255, K256, K260, K261, K262, K264, K265, K266, K270, K271, K272, K274, K275, K276, K279, K280, K281, K282, K284, K285, K286, K290, K920, K921, K922 |
| Lower GI bleed         | K625                                                                                                                                                                                     |
| Ischaemic stroke       | G45, G450, G451, G452, G453, G454, G458, G459, I63, I630, I631, I632, I633, I634, I635, I636, I638, I639, I64, I64X                                                                      |
| Venous thromboembolism | I26, I260, I269, I81, I81X, I82, I820, I822, I823, I828, I829                                                                                                                            |

eTable 2 Supplementary data for Figure2: Number of patients starting anticoagulants by study year

| Year | QResearch |            |             |          | CPRD     |            |             |          |
|------|-----------|------------|-------------|----------|----------|------------|-------------|----------|
|      | Warfarin  | Dabigatran | Rivaroxaban | Apixaban | Warfarin | Dabigatran | Rivaroxaban | Apixaban |
| 2011 | 21807     | 167        | 190         |          | 7841     | 54         | 42          |          |
| 2012 | 23608     | 1055       | 607         | 13       | 7843     | 246        | 46          | <5       |
| 2013 | 20538     | 1606       | 2611        | 336      | 6940     | 412        | 719         | 78*      |
| 2014 | 16622     | 1446       | 6109        | 1802     | 5161     | 352        | 1733        | 482      |
| 2015 | 12573     | 1204       | 11342       | 5701     | 2836     | 237        | 2715        | 1046     |
| 2016 | 6104      | 924        | 11161       | 8479     | 358      | 41         | 588         | 286      |

\*) This figure includes patients for 2012 and 2013

eTable 3 Patients with atrial fibrillation: Characteristics of patients in the QResearch and CPRD cohorts, percentage (numbers).

|                                        | QResearch     |              |               |              | CPRD         |              |              |              |
|----------------------------------------|---------------|--------------|---------------|--------------|--------------|--------------|--------------|--------------|
|                                        | warfarin      | dabigatran   | rivaroxaban   | apixaban     | warfarin     | dabigatran   | rivaroxaban  | apixaban     |
|                                        | % (n)         | % (n)        | % (n)         | % (n)        | % (n)        | % (n)        | % (n)        | % (n)        |
| Total N of patients                    | 53921         | 4534         | 13597         | 9199         | 16664        | 1003         | 2950         | 1402         |
| Age at baseline                        |               |              |               |              |              |              |              |              |
| 20-49                                  | 2.3 (1233)    | 2.2 (98)     | 1.8 (245)     | 1.6 (150)    | 2.2 (362)    | 1.9 (19)     | 1.8 (54)     | 1.6 (22)     |
| 50-59                                  | 5.9 (3201)    | 6.0 (274)    | 5.9 (798)     | 5.7 (521)    | 5.9 (986)    | 8.1 (81)     | 5.8 (170)    | 5.8 (82)     |
| 60-69                                  | 19.5 (10505)  | 21.1 (956)   | 19.2 (2613)   | 17.5 (1612)  | 19.5 (3246)  | 20.4 (205)   | 19.4 (572)   | 17.2 (241)   |
| 70-79                                  | 36.3 (19594)  | 35.2 (1595)  | 32.7 (4450)   | 31.7 (2912)  | 36.1 (6016)  | 35.9 (360)   | 32.2 (949)   | 32.2 (451)   |
| 80-89                                  | 31.2 (16831)  | 29.2 (1326)  | 31.8 (4327)   | 33.2 (3053)  | 32.0 (5326)  | 27.5 (276)   | 31.9 (942)   | 32.7 (459)   |
| 90 and over                            | 4.7 (2557)    | 6.3 (285)    | 8.6 (1164)    | 10.3 (951)   | 4.4 (728)    | 6.2 (62)     | 8.9 (263)    | 10.5 (147)   |
| Ethnicity recorded                     | 84.2 (45426)  | 81.7 (3704)  | 80.9 (11000)  | 83.2 (7658)  | 96.4 (16066) | 93.6 (939)   | 94.9 (2799)  | 95.3 (1336)  |
| White or not recorded (UK or European) | 97.0 (52308)  | 98.5 (4464)  | 97.1 (13205)  | 97.5 (8972)  | 97.9 (16319) | 98.5 (988)   | 98.4 (2904)  | 97.9 (1372)  |
| Ethnic minorities                      |               |              |               |              | 2.1 (345)    | 1.5 (15)     | 1.6 (46)     | 2.1 (30)     |
| Indian                                 | 0.7 (363)     | 0.4 (17)     | 0.7 (101)     | 0.5 (48)     |              |              |              |              |
| Pakistani                              | 0.3 (167)     | 0.2 (7)      | 0.3 (46)      | 0.4 (36)     |              |              |              |              |
| Bangladeshi                            | 0.2 (102)     | 0.1 (<5)     | 0.1 (14)      | 0.2 (16)     |              |              |              |              |
| Other Asian                            | 0.3 (166)     | 0.2 (11)     | 0.2 (29)      | 0.2 (17)     |              |              |              |              |
| Caribbean                              | 0.6 (314)     | 0.3 (12)     | 0.5 (72)      | 0.4 (37)     |              |              |              |              |
| Black African                          | 0.2 (123)     | 0.1 (<5)     | 0.3 (36)      | 0.2 (19)     |              |              |              |              |
| Other                                  | 0.6 (316)     | 0.4 (16)     | 0.6 (80)      | 0.5 (44)     |              |              |              |              |
| BMI recorded                           | 97.0 (52299)  | 96.2 (4363)  | 95.7 (13013)  | 95.8 (8811)  | 96.9 (16143) | 95.6 (959)   | 96.4 (2845)  | 95.7 (1342)  |
| Mean BMI in kg/m <sup>2</sup> (SD)     | 28.7 (5.7)    | 28.3 (5.5)   | 28.4 (5.6)    | 28.3 (5.6)   | 28.5 (5.8)   | 28.3 (6.0)   | 28.1 (5.8)   | 28.2 (5.7)   |
| SBP recorded                           | 100.0 (53912) | 100.0 (4532) | 100.0 (13594) | 100.0 (9197) | 99.8 (16636) | 99.8 (1001)  | 99.8 (2945)  | 100.0 (1402) |
| Systolic blood pressure in mmHg (SD)   | 131.2 (17.5)  | 131.7 (17.1) | 131.3 (17.1)  | 131.2 (17.2) | 132.3 (17.2) | 132.0 (16.0) | 131.8 (16.9) | 133.1 (17.2) |
| Smoking                                |               |              |               |              |              |              |              |              |
| Recorded                               | 99.9 (53856)  | 100.0 (4532) | 99.9 (13578)  | 99.8 (9185)  | 99.9 (16653) | 100.0 (1003) | 99.9 (2948)  | 99.8 (1399)  |
| Non-smoker                             | 50.5 (27255)  | 52.1 (2360)  | 52.9 (7193)   | 53.4 (4910)  | 50.9 (8480)  | 53.2 (534)   | 52.6 (1552)  | 52.1 (730)   |

|                            |              |             |              |             |              |            |             |             |
|----------------------------|--------------|-------------|--------------|-------------|--------------|------------|-------------|-------------|
| Ex-smoker                  | 41.5 (22380) | 40.8 (1852) | 39.5 (5373)  | 39.0 (3591) | 42.3 (7055)  | 40.4 (405) | 40.0 (1179) | 40.9 (574)  |
| Current smoker             | 7.8 (4221)   | 7.1 (320)   | 7.4 (1012)   | 7.4 (684)   | 6.7 (1118)   | 6.4 (64)   | 7.4 (217)   | 6.8 (95)    |
| Current light smoker       | 4.4 (2375)   | 3.9 (177)   | 4.3 (582)    | 4.3 (391)   | 4.1 (678)    | 4.3 (43)   | 4.7 (139)   | 5.1 (72)    |
| Current moderate smoker    | 2.1 (1152)   | 1.9 (87)    | 1.9 (264)    | 1.8 (161)   | 1.7 (283)    | 1.5 (15)   | 1.6 (48)    | 1.2 (17)    |
| Current heavy smoker       | 1.3 (694)    | 1.2 (56)    | 1.2 (166)    | 1.4 (132)   | 0.9 (157)    | 0.6 (6)    | 1.0 (30)    | 0.4 (6)     |
| Not recorded               | 0.1 (65)     | 0.0 (2)     | 0.1 (19)     | 0.2 (14)    | 0.1 (11)     | 0          | 0.1 (2)     | 0.2 (3)     |
| Alcohol consumption        |              |             |              |             |              |            |             |             |
| Recorded                   | 94.7 (51063) | 93.9 (4257) | 94.2 (12815) | 94.5 (8689) | 94.9 (15814) | 93.1 (934) | 94.1 (2775) | 93.6 (1312) |
| Non-drinker                | 34.2 (18465) | 29.3 (1328) | 33.7 (4583)  | 36.5 (3361) | 32.4 (5400)  | 29.5 (296) | 33.1 (976)  | 32.7 (459)  |
| Trivial (< 1 unit per day) | 28.5 (15364) | 27.3 (1238) | 26.8 (3642)  | 26.0 (2393) | 32.9 (5484)  | 29.4 (295) | 31.4 (926)  | 30.2 (424)  |
| Light (1-2 units per day)  | 13.9 (7470)  | 14.6 (664)  | 13.4 (1823)  | 13.3 (1221) | 17.9 (2975)  | 18.2 (183) | 16.1 (476)  | 17.3 (243)  |
| Moderate (3-6 units/day)   | 16.1 (8681)  | 19.9 (901)  | 17.9 (2433)  | 16.1 (1477) | 6.3 (1054)   | 8.0 (80)   | 6.7 (197)   | 6.3 (89)    |
| Heavy (7-9 units/day)      | 1.3 (712)    | 1.7 (79)    | 1.6 (222)    | 1.6 (149)   | 3.2 (530)    | 4.6 (46)   | 4.8 (143)   | 4.5 (63)    |
| Very heavy (>9 units/day)  | 0.7 (371)    | 1.0 (47)    | 0.8 (112)    | 1.0 (88)    | 2.2 (371)    | 3.4 (34)   | 1.9 (57)    | 2.4 (34)    |
| Not recorded               | 5.3 (2858)   | 6.1 (277)   | 5.8 (782)    | 5.5 (510)   | 5.1 (850)    | 6.9 (69)   | 5.9 (175)   | 6.4 (90)    |
| Townsend quintiles         |              |             |              |             |              |            |             |             |
| 1 (Affluent)               | 21.2 (11446) | 25.5 (1154) | 20.8 (2833)  | 22.3 (2054) | 25.3 (4224)  | 28.3 (284) | 28.1 (828)  | 29.3 (411)  |
| 2                          | 21.3 (11506) | 24.6 (1116) | 22.1 (3009)  | 21.5 (1979) | 25.8 (4294)  | 28.1 (282) | 27.2 (802)  | 24.4 (342)  |
| 3                          | 20.5 (11039) | 20.3 (922)  | 21.7 (2948)  | 20.0 (1838) | 21.8 (3636)  | 20.9 (210) | 20.3 (598)  | 20.5 (287)  |
| 4                          | 18.6 (10026) | 17.2 (782)  | 19.5 (2648)  | 19.2 (1766) | 17.4 (2899)  | 13.9 (139) | 15.9 (469)  | 16.1 (226)  |
| 5 (Deprived)               | 18.4 (9904)  | 12.4 (560)  | 15.9 (2159)  | 17.0 (1562) | 9.6 (1603)   | 8.8 (88)   | 8.6 (253)   | 9.7 (136)   |

eTable 4 Patients without atrial fibrillation: Characteristics of patients in the QResearch and CPRD cohorts, percentage (numbers).

|                                        | QResearch    |              |              |              | CPRD         |              |              |              |
|----------------------------------------|--------------|--------------|--------------|--------------|--------------|--------------|--------------|--------------|
|                                        | warfarin     | dabigatran   | rivaroxaban  | apixaban     | warfarin     | dabigatran   | rivaroxaban  | apixaban     |
|                                        | % (n)        | % (n)        | % (n)        | % (n)        | % (n)        | % (n)        | % (n)        | % (n)        |
| Total N of patients                    | 47331        | 1868         | 18423        | 7132         | 14315        | 339          | 2893         | 490          |
| Age at baseline                        |              |              |              |              |              |              |              |              |
| 20-49                                  | 16.3 (7719)  | 6.6 (124)    | 14.2 (2619)  | 6.2 (444)    | 16.7 (2392)  | 5.6 (19)     | 16.5 (477)   | 5.7 (28)     |
| 50-59                                  | 13.8 (6532)  | 9.7 (181)    | 12.9 (2385)  | 8.2 (587)    | 13.9 (1989)  | 12.1 (41)    | 13.3 (385)   | 6.5 (32)     |
| 60-69                                  | 21.4 (10127) | 22.1 (413)   | 20.5 (3785)  | 17.3 (1231)  | 21.0 (2999)  | 20.4 (69)    | 20.3 (588)   | 15.1 (74)    |
| 70-79                                  | 25.8 (12204) | 32.6 (609)   | 25.3 (4660)  | 29.2 (2081)  | 25.9 (3703)  | 31.9 (108)   | 24.5 (709)   | 30.2 (148)   |
| 80-89                                  | 19.3 (9158)  | 24.3 (453)   | 21.3 (3919)  | 30.1 (2146)  | 19.1 (2731)  | 24.8 (84)    | 20.1 (582)   | 32.0 (157)   |
| 90 and over                            | 3.4 (1591)   | 4.7 (88)     | 5.7 (1055)   | 9.0 (643)    | 3.5 (500)    | 5.3 (18)     | 5.3 (152)    | 10.4 (51)    |
| Ethnicity recorded                     | 82.8 (39209) | 82.0 (1531)  | 80.3 (14787) | 82.9 (5910)  | 97.0 (13885) | 95.6 (324)   | 95.0 (2748)  | 96.3 (472)   |
| White or not recorded (UK or European) | 94.5 (44735) | 96.8 (1808)  | 95.9 (17673) | 96.2 (6864)  | 96.0 (13745) | 98.5 (334)   | 96.9 (2804)  | 98.4 (482)   |
| Ethnic minorities                      |              |              |              |              | 4.0 (570)    | 1.5 (5)      | 3.1 (89)     | 1.6 (8)      |
| Indian                                 | 1.0 (477)    | 0.9 (17)     | 0.7 (136)    | 0.8 (60)     |              |              |              |              |
| Pakistani                              | 0.6 (292)    | 0.3 (5)      | 0.4 (82)     | 0.5 (36)     |              |              |              |              |
| Bangladeshi                            | 0.3 (125)    | 0.2 (<5)     | 0.1 (20)     | 0.2 (16)     |              |              |              |              |
| Other Asian                            | 0.4 (199)    | 0.3 (6)      | 0.3 (56)     | 0.2 (16)     |              |              |              |              |
| Caribbean                              | 1.2 (568)    | 0.9 (17)     | 0.9 (175)    | 0.7 (52)     |              |              |              |              |
| Black African                          | 0.8 (355)    | 0.2 (<5)     | 0.6 (114)    | 0.2 (16)     |              |              |              |              |
| Other                                  | 1.1 (537)    | 0.3 (6)      | 0.9 (157)    | 0.8 (60)     |              |              |              |              |
| BMI recorded                           | 94.7 (44826) | 95.0 (1774)  | 94.0 (17317) | 95.4 (6803)  | 94.9 (13580) | 95.6 (324)   | 94.5 (2734)  | 95.9 (470)   |
| Mean BMI in kg/m <sup>2</sup> (SD)     | 28.8 (5.8)   | 28.8 (5.6)   | 29.0 (5.9)   | 28.4 (5.7)   | 28.8 (6.1)   | 28.0 (5.1)   | 28.7 (6.2)   | 27.8 (5.9)   |
| SBP recorded                           | 99.5 (47115) | 99.7 (1863)  | 99.3 (18294) | 99.7 (7108)  | 98.9 (14160) | 99.7 (338)   | 98.8 (2859)  | 99.6 (488)   |
| Systolic blood pressure in mmHg (SD)   | 131.0 (17.8) | 132.6 (18.0) | 131.6 (17.3) | 130.9 (18.0) | 131.7 (17.0) | 133.1 (16.2) | 131.8 (16.4) | 131.5 (16.9) |
| Smoking                                |              |              |              |              |              |              |              |              |
| Recorded                               | 99.6 (47142) | 99.7 (1863)  | 99.6 (18353) | 99.7 (7113)  | 99.9 (14300) | 100.0 (339)  | 99.7 (2884)  | 99.6 (488)   |
| Non-smoker                             | 49.9 (23605) | 49.9 (933)   | 51.9 (9563)  | 50.3 (3589)  | 49.2 (7049)  | 50.4 (171)   | 51.3 (1483)  | 50.2 (246)   |

|                            |              |             |              |             |              |            |             |            |
|----------------------------|--------------|-------------|--------------|-------------|--------------|------------|-------------|------------|
| Ex-smoker                  | 35.5 (16803) | 38.8 (725)  | 34.3 (6311)  | 38.6 (2755) | 37.2 (5320)  | 40.1 (136) | 33.9 (981)  | 42.4 (208) |
| Current smoker             | 14.2 (6734)  | 11.0 (205)  | 13.5 (2479)  | 10.8 (769)  | 13.5 (1931)  | 9.4 (32)   | 14.5 (420)  | 6.9 (34)   |
| Current light smoker       | 7.1 (3382)   | 5.7 (107)   | 7.1 (1303)   | 6.2 (445)   | 7.4 (1056)   | 7.1 (24)   | 8.1 (233)   | 4.7 (23)   |
| Current moderate smoker    | 4.2 (2001)   | 3.3 (62)    | 3.8 (697)    | 2.8 (198)   | 3.8 (547)    | 1.2 (4)    | 4.0 (117)   | 1.2 (6)    |
| Current heavy smoker       | 2.9 (1351)   | 1.9 (36)    | 2.6 (479)    | 1.8 (126)   | 2.3 (328)    | 1.2 (4)    | 2.4 (70)    | 1.0 (5)    |
| Not recorded               | 0.4 (189)    | 0.3 (5)     | 0.4 (70)     | 0.3 (19)    | 0.1 (15)     | 0          | 0.3 (9)     | 0.4 (2)    |
| Alcohol consumption        |              |             |              |             |              |            |             |            |
| Recorded                   | 91.5 (43321) | 92.7 (1732) | 90.9 (16753) | 94.0 (6705) | 92.0 (13163) | 91.7 (311) | 90.1 (2606) | 92.9 (455) |
| Non-drinker                | 34.9 (16526) | 31.8 (594)  | 34.5 (6354)  | 38.9 (2776) | 33.5 (4799)  | 30.7 (104) | 33.7 (974)  | 34.1 (167) |
| Trivial (< 1 unit per day) | 28.0 (13241) | 28.5 (532)  | 27.6 (5088)  | 26.0 (1854) | 31.9 (4565)  | 33.3 (113) | 30.5 (883)  | 33.5 (164) |
| Light (1-2 units per day)  | 12.4 (5860)  | 13.1 (245)  | 12.6 (2326)  | 12.8 (914)  | 15.6 (2226)  | 17.7 (60)  | 15.2 (439)  | 14.5 (71)  |
| Moderate (3-6 units/day)   | 14.0 (6645)  | 16.8 (313)  | 14.0 (2571)  | 13.9 (993)  | 5.9 (845)    | 5.9 (20)   | 6.1 (177)   | 7.8 (38)   |
| Heavy (7-9 units/day)      | 1.2 (588)    | 1.5 (28)    | 1.3 (231)    | 1.4 (100)   | 3.0 (423)    | 2.4 (8)    | 2.7 (77)    | 1.6 (8)    |
| Very heavy (>9 units/day)  | 1.0 (461)    | 1.1 (20)    | 1.0 (183)    | 1.0 (68)    | 2.1 (305)    | 1.8 (6)    | 1.9 (56)    | 1.4 (7)    |
| Not recorded               | 8.5 (4010)   | 7.3 (136)   | 9.1 (1670)   | 6.0 (427)   | 8.0 (1152)   | 8.3 (28)   | 9.9 (287)   | 7.1 (35)   |
| Townsend quintiles         |              |             |              |             |              |            |             |            |
| 1 (Affluent)               | 19.3 (9125)  | 24.0 (448)  | 19.7 (3622)  | 20.0 (1428) | 23.3 (3334)  | 28.3 (96)  | 23.7 (687)  | 28.6 (140) |
| 2                          | 19.9 (9412)  | 20.3 (380)  | 20.5 (3771)  | 21.7 (1545) | 23.5 (3362)  | 30.1 (102) | 24.9 (720)  | 26.1 (128) |
| 3                          | 19.9 (9419)  | 22.7 (424)  | 21.6 (3982)  | 20.7 (1476) | 21.5 (3071)  | 18.3 (62)  | 21.4 (619)  | 22.0 (108) |
| 4                          | 19.7 (9328)  | 17.1 (319)  | 20.7 (3816)  | 19.7 (1408) | 19.5 (2786)  | 13.9 (47)  | 19.1 (553)  | 16.7 (82)  |
| 5 (Deprived)               | 21.2 (10047) | 15.9 (297)  | 17.5 (3232)  | 17.9 (1275) | 12.2 (1752)  | 9.4 (32)   | 10.8 (313)  | 6.5 (32)   |

eTable 5 All patients: Rates per 1000py of outcomes by drug and adjusted hazard ratios with reference to warfarin in QResearch and CPRD

|                           | QResearch    |                                          |                                             | CPRD         |                                          |                                             |
|---------------------------|--------------|------------------------------------------|---------------------------------------------|--------------|------------------------------------------|---------------------------------------------|
|                           | Person-years | Age-sex adjusted rate per 1000py (95%CI) | Adjusted hazard ratios (95%CI) <sup>a</sup> | Person-years | Age-sex adjusted rate per 1000py (95%CI) | Adjusted hazard ratios (95%CI) <sup>a</sup> |
| <b>Major bleeding</b>     |              |                                          |                                             |              |                                          |                                             |
| Warfarin                  | 111,823      | 26.54 (25.58 to 27.50)                   | Reference                                   | 29,590       | 30.29 (28.30 to 32.28)                   | Reference                                   |
| Dabigatran                | 6,117        | 22.92 (18.98 to 26.87)                   | 0.91 (0.77 to 1.08)                         | 1,069        | 20.24 (11.93 to 28.55)                   | 0.74 (0.49 to 1.13)                         |
| Rivaroxaban               | 20,581       | 27.83 (25.54 to 30.12)                   | 1.03 (0.93 to 1.14)                         | 2,986        | 36.09 (29.16 to 43.01)                   | 1.15 (0.91 to 1.44)                         |
| Apixaban                  | 10,744       | 16.62 (14.14 to 19.10)                   | 0.61 (0.52 to 0.71)*                        | 987          | 22.29 (13.23 to 31.34)                   | 0.75 (0.49 to 1.14)                         |
| <b>Intracranial bleed</b> |              |                                          |                                             |              |                                          |                                             |
| Warfarin                  | 113,705      | 6.21 (5.75 to 6.68)                      | Reference                                   | 30,033       | 6.39 (5.48 to 7.30)                      | Reference                                   |
| Dabigatran                | 6,218        | 2.87 (1.53 to 4.20)                      | 0.44 (0.27 to 0.71)*                        | 1,078        | 1.73 (0.00 to 4.13)                      | n/a <sup>b</sup>                            |
| Rivaroxaban               | 20,823       | 4.49 (3.58 to 5.40)                      | 0.68 (0.54 to 0.87)*                        | 3,020        | 6.14 (3.32 to 8.95)                      | 1.00 (0.59 to 1.69)                         |
| Apixaban                  | 10,805       | 3.37 (2.30 to 4.44)                      | 0.48 (0.34 to 0.68)*                        | 994          | 3.40 (0.00 to 6.86)                      | n/a <sup>b</sup>                            |
| <b>Haematuria</b>         |              |                                          |                                             |              |                                          |                                             |
| Warfarin                  | 112,791      | 8.29 (7.76 to 8.82)                      | Reference                                   | 29,844       | 8.96 (7.88 to 10.03)                     | Reference                                   |
| Dabigatran                | 6,173        | 6.56 (4.51 to 8.61)                      | 0.89 (0.65 to 1.23)                         | 1,074        | 7.02 (2.14 to 11.91)                     | 0.91 (0.45 to 1.86)                         |
| Rivaroxaban               | 20,730       | 8.40 (7.13 to 9.66)                      | 1.15 (0.95 to 1.38)                         | 3,003        | 10.94 (7.13 to 14.75)                    | 1.51 (0.98 to 2.32)                         |
| Apixaban                  | 10,789       | 4.54 (3.29 to 5.78)                      | 0.69 (0.51 to 0.94)                         | 991          | 7.20 (2.24 to 12.16)                     | 1.17 (0.57 to 2.42)                         |
| <b>Haemoptysis</b>        |              |                                          |                                             |              |                                          |                                             |
| Warfarin                  | 113,667      | 1.49 (1.27 to 1.72)                      | Reference                                   | 30,019       | 1.68 (1.22 to 2.15)                      | Reference                                   |
| Dabigatran                | 6,204        | 1.47 (0.55 to 2.39)                      | 1.18 (0.62 to 2.27)                         | 1,078        | 0.97 (0.00 to 2.87)                      | n/a <sup>b</sup>                            |
| Rivaroxaban               | 20,820       | 1.64 (1.09 to 2.20)                      | 1.09 (0.71 to 1.66)                         | 3,021        | 2.16 (0.43 to 3.89)                      | 1.37 (0.51 to 3.70)                         |
| Apixaban                  | 10,811       | 0.45 (0.05 to 0.85)                      | 0.32 (0.13 to 0.82)                         | 994          | 0.83 (0.00 to 2.47)                      | n/a <sup>b</sup>                            |
| <b>All GI bleed</b>       |              |                                          |                                             |              |                                          |                                             |
| Warfarin                  | 113,044      | 10.50 (9.90 to 11.10)                    | Reference                                   | 29,863       | 13.28 (11.97 to 14.59)                   | Reference                                   |
| Dabigatran                | 6,180        | 12.19 (9.23 to 15.15)                    | 1.20 (0.94 to 1.52)                         | 1,074        | 10.41 (4.48 to 16.34)                    | 0.88 (0.49 to 1.57)                         |
| Rivaroxaban               | 20,717       | 13.44 (11.86 to 15.02)                   | 1.16 (1.00 to 1.35)                         | 3,008        | 17.18 (12.44 to 21.92)                   | 1.04 (0.75 to 1.44)                         |
| Apixaban                  | 10,774       | 8.47 (6.64 to 10.30)                     | 0.68 (0.54 to 0.85)*                        | 991          | 10.79 (4.29 to 17.30)                    | 0.61 (0.33 to 1.15)                         |
| <b>Upper GI bleed</b>     |              |                                          |                                             |              |                                          |                                             |
| Warfarin                  | 113,143      | 9.36 (8.79 to 9.93)                      | Reference                                   | 29,886       | 11.96 (10.72 to 13.20)                   | Reference                                   |
| Dabigatran                | 6,181        | 11.62 (8.72 to 14.53)                    | 1.24 (0.97 to 1.59)                         | 1,075        | 9.28 (3.78 to 14.79)                     | 0.89 (0.48 to 1.64)                         |
| Rivaroxaban               | 20,728       | 12.58 (11.05 to 14.11)                   | 1.18 (1.01 to 1.37)                         | 3,008        | 16.84 (12.14 to 21.53)                   | 1.12 (0.80 to 1.56)                         |
| Apixaban                  | 10,779       | 7.92 (6.15 to 9.69)                      | 0.68 (0.53 to 0.87)*                        | 992          | 9.67 (3.55 to 15.79)                     | 0.61 (0.31 to 1.17)                         |

|                                     |         |                        |                      |        |                        |                      |
|-------------------------------------|---------|------------------------|----------------------|--------|------------------------|----------------------|
| <b>Rectal bleed</b>                 |         |                        |                      |        |                        |                      |
| Warfarin                            | 113,685 | 1.23 (1.03 to 1.44)    | Reference            | 30,030 | 1.44 (1.01 to 1.87)    | Reference            |
| Dabigatran                          | 6,218   | 0.70 (0.08 to 1.31)    | 0.86 (0.35 to 2.12)  | 1,078  | 1.12 (0.00 to 3.33)    | n/a <sup>b</sup>     |
| Rivaroxaban                         | 20,826  | 0.84 (0.45 to 1.24)    | 0.94 (0.54 to 1.64)  | 3,022  | 0.34 (0.00 to 1.00)    | n/a <sup>b</sup>     |
| Apixaban                            | 10,808  | 0.62 (0.14 to 1.09)    | 0.74 (0.32 to 1.73)  | 993    | 1.10 (0.00 to 3.25)    | n/a <sup>b</sup>     |
| <b>Ischaemic stroke<sup>c</sup></b> |         |                        |                      |        |                        |                      |
| Warfarin                            | 93,464  | 12.68 (11.95 to 13.41) | Reference            | 24,808 | 13.57 (12.11 to 15.02) | Reference            |
| Dabigatran                          | 4,499   | 16.27 (12.59 to 19.95) | 1.28 (1.01 to 1.62)  | 759    | 12.71 (4.65 to 20.76)  | 0.88 (0.46 to 1.66)  |
| Rivaroxaban                         | 17,275  | 12.04 (10.41 to 13.68) | 0.94 (0.80 to 1.11)  | 2,424  | 17.34 (12.05 to 22.64) | 1.17 (0.81 to 1.69)  |
| Apixaban                            | 7,883   | 15.20 (12.52 to 17.88) | 1.14 (0.93 to 1.41)  | 656    | 16.15 (6.90 to 25.40)  | 1.02 (0.55 to 1.89)  |
| <b>VTE<sup>d</sup></b>              |         |                        |                      |        |                        |                      |
| Warfarin                            | 88,065  | 11.03 (10.34 to 11.72) | Reference            | 22,203 | 11.23 (9.83 to 12.62)  | Reference            |
| Dabigatran                          | 5,976   | 2.60 (1.32 to 3.89)    | 0.20 (0.12 to 0.33)* | 1,012  | 6.96 (1.80 to 12.12)   | 0.49 (0.23 to 1.05)  |
| Rivaroxaban                         | 15,993  | 46.96 (43.54 to 50.38) | 1.51 (1.34 to 1.71)* | 2,258  | 56.88 (46.70 to 67.06) | 1.86 (1.41 to 2.46)* |
| Apixaban                            | 9,978   | 12.33 (9.86 to 14.81)  | 0.46 (0.37 to 0.57)* | 913    | 8.23 (2.38 to 14.09)   | 0.49 (0.24 to 1.02)  |
| <b>Mortality</b>                    |         |                        |                      |        |                        |                      |
| Warfarin                            | 113,799 | 49.31 (47.99 to 50.63) | Reference            | 30,057 | 47.13 (44.64 to 49.61) | Reference            |
| Dabigatran                          | 6,220   | 47.43 (39.08 to 55.79) | 1.02 (0.91 to 1.15)  | 1,078  | 44.90 (32.55 to 57.25) | 1.16 (0.88 to 1.54)  |
| Rivaroxaban                         | 20,837  | 67.96 (64.49 to 71.43) | 1.32 (1.24 to 1.41)* | 3,022  | 73.89 (64.31 to 83.48) | 1.45 (1.24 to 1.70)* |
| Apixaban                            | 10,812  | 59.40 (55.03 to 63.77) | 1.12 (1.03 to 1.22)  | 994    | 62.05 (47.47 to 76.64) | 1.37 (1.06 to 1.76)  |

<sup>a</sup>) adjusted for age, sex, ethnicity, smoking, alcohol, Townsend quintile, BMI, SPB, falls&hipfracture, hip/knee ops, comorbidities (alcoholism, AF, treated hypertension, CKD, COPD, liver disease, CHD, CCF, any cancer, valvular, peptic ulcer), previous events (bleed, VTE, ischaemic stroke), medications at the baseline (macrolides, antiplatelets, anticonvulsant, corticosteroids, NSAIDs, statin, hormones), study year

<sup>b</sup>) insufficient data for analysis

<sup>c</sup>) based on patients without previous ischaemic stroke

<sup>d</sup>) based on patients without previous VTE

\*) P-value<0.01



eTable 6 Patients with and without atrial fibrillation: Adjusted hazard ratios (95% CI) for outcomes associated with exposure to study drugs compared with warfarin, by database

| Comparison with warfarin            | With atrial fibrillation         |         |                                  |         | Without atrial fibrillation      |         |                                  |         |
|-------------------------------------|----------------------------------|---------|----------------------------------|---------|----------------------------------|---------|----------------------------------|---------|
|                                     | QResearch                        |         | CPRD                             |         | QResearch                        |         | CPRD                             |         |
|                                     | Adjusted HR (95%CI) <sup>a</sup> | P-value | Adjusted HR (95%CI) <sup>a</sup> | P-value | Adjusted HR (95%CI) <sup>a</sup> | P-value | Adjusted HR (95%CI) <sup>a</sup> | P-value |
| <b>Major bleeding</b>               |                                  |         |                                  |         |                                  |         |                                  |         |
| Dabigatran                          | 0.90 (0.74 to 1.10)              | 0.3     | 0.68 (0.42 to 1.11)              | 0.1     | 0.97 (0.68 to 1.37)              | 0.8     | 1.04 (0.46 to 2.37)              | 0.9     |
| Rivaroxaban                         | 1.10 (0.96 to 1.25)              | 0.2     | 1.21 (0.91 to 1.63)              | 0.2     | 0.94 (0.80 to 1.10)              | 0.4     | 1.03 (0.72 to 1.50)              | 0.9     |
| Apixaban                            | 0.62 (0.50 to 0.75)              | <0.001  | 0.91 (0.57 to 1.44)              | 0.7     | 0.60 (0.46 to 0.79)              | <0.001  | n/a <sup>b</sup>                 |         |
| <b>Intracranial bleed</b>           |                                  |         |                                  |         |                                  |         |                                  |         |
| Dabigatran                          | 0.45 (0.26 to 0.77)              | 0.004   | n/a <sup>b</sup>                 |         | 0.44 (0.16 to 1.19)              | 0.1     | n/a <sup>b</sup>                 |         |
| Rivaroxaban                         | 0.78 (0.59 to 1.04)              | 0.09    | 1.39 (0.76 to 2.57)              | 0.3     | 0.54 (0.35 to 0.82)              | 0.004   | n/a <sup>b</sup>                 |         |
| Apixaban                            | 0.40 (0.25 to 0.64)              | <0.001  | n/a <sup>b</sup>                 |         | 0.63 (0.37 to 1.08)              | 0.09    | n/a <sup>b</sup>                 |         |
| <b>Haematuria</b>                   |                                  |         |                                  |         |                                  |         |                                  |         |
| Dabigatran                          | 0.94 (0.66 to 1.35)              | 0.7     | 1.01 (0.47 to 2.20)              | 1       | 0.78 (0.38 to 1.59)              | 0.5     | n/a <sup>b</sup>                 |         |
| Rivaroxaban                         | 1.21 (0.95 to 1.54)              | 0.1     | 1.68 (0.98 to 2.87)              | 0.06    | 1.07 (0.79 to 1.45)              | 0.7     | 1.24 (0.60 to 2.56)              | 0.6     |
| Apixaban                            | 0.68 (0.46 to 1.00)              | 0.05    | 1.26 (0.54 to 2.90)              | 0.6     | 0.73 (0.45 to 1.20)              | 0.2     | n/a <sup>b</sup>                 |         |
| <b>All GI bleed</b>                 |                                  |         |                                  |         |                                  |         |                                  |         |
| Dabigatran                          | 1.16 (0.87 to 1.53)              | 0.3     | 0.72 (0.35 to 1.47)              | 0.4     | 1.36 (0.85 to 2.18)              | 0.2     | n/a <sup>b</sup>                 |         |
| Rivaroxaban                         | 1.25 (1.03 to 1.52)              | 0.03    | 1.04 (0.68 to 1.60)              | 0.9     | 1.02 (0.81 to 1.28)              | 0.9     | 0.99 (0.60 to 1.65)              | 1       |
| Apixaban                            | 0.76 (0.57 to 1.02)              | 0.07    | 0.75 (0.38 to 1.48)              | 0.4     | 0.55 (0.37 to 0.83)              | 0.004   | n/a <sup>b</sup>                 |         |
| <b>Upper GI bleed</b>               |                                  |         |                                  |         |                                  |         |                                  |         |
| Dabigatran                          | 1.25 (0.94 to 1.67)              | 0.1     | 0.69 (0.32 to 1.47)              | 0.3     | 1.25 (0.75 to 2.08)              | 0.4     | n/a <sup>b</sup>                 |         |
| Rivaroxaban                         | 1.27 (1.04 to 1.56)              | 0.02    | 1.07 (0.68 to 1.66)              | 0.8     | 1.03 (0.81 to 1.30)              | 0.8     | 1.14 (0.68 to 1.90)              | 0.6     |
| Apixaban                            | 0.77 (0.57 to 1.04)              | 0.09    | 0.70 (0.34 to 1.44)              | 0.3     | 0.55 (0.36 to 0.83)              | 0.005   | n/a <sup>b</sup>                 |         |
| <b>Ischaemic stroke<sup>c</sup></b> |                                  |         |                                  |         |                                  |         |                                  |         |
| Dabigatran                          | 1.18 (0.90 to 1.55)              | 0.2     | 0.74 (0.35 to 1.59)              | 0.4     | 1.76 (1.09 to 2.83)              | 0.02    | n/a <sup>b</sup>                 |         |
| Rivaroxaban                         | 0.95 (0.77 to 1.16)              | 0.6     | 1.46 (0.96 to 2.23)              | 0.08    | 0.98 (0.74 to 1.29)              | 0.9     | 0.67 (0.31 to 1.43)              | 0.3     |
| Apixaban                            | 1.15 (0.90 to 1.49)              | 0.3     | 0.95 (0.46 to 1.96)              | 0.9     | 1.16 (0.80 to 1.68)              | 0.4     | n/a <sup>b</sup>                 |         |
| <b>VTE<sup>d</sup></b>              |                                  |         |                                  |         |                                  |         |                                  |         |
| Dabigatran                          | 0.41 (0.18 to 0.93)              | 0.03    | n/a <sup>b</sup>                 |         | 0.15 (0.08 to 0.29)              | <0.001  | 0.58 (0.25 to 1.35)              | 0.2     |
| Rivaroxaban                         | 1.34 (0.94 to 1.91)              | 0.1     | 1.14 (0.56 to 2.30)              |         | 1.43 (1.25 to 1.63)              | <0.001  | 1.92 (1.41 to 2.62)              | <0.001  |

|                  |                     |        |                     |      |                     |        |                     |        |
|------------------|---------------------|--------|---------------------|------|---------------------|--------|---------------------|--------|
| Apixaban         | 0.82 (0.48 to 1.39) | 0.5    | 0.99 (0.36 to 2.69) |      | 0.42 (0.33 to 0.53) | <0.001 | n/a <sup>b</sup>    |        |
| <b>Mortality</b> |                     |        |                     |      |                     |        |                     |        |
| Dabigatran       | 0.98 (0.85 to 1.13) | 0.8    | 1.03 (0.74 to 1.43) | 0.9  | 1.10 (0.87 to 1.39) | 0.4    | 1.52 (0.89 to 2.62) | 0.1    |
| Rivaroxaban      | 1.19 (1.09 to 1.30) | <0.001 | 1.18 (0.94 to 1.49) | 0.1  | 1.47 (1.33 to 1.62) | <0.001 | 1.76 (1.39 to 2.22) | <0.001 |
| Apixaban         | 1.10 (0.98 to 1.23) | 0.1    | 1.34 (0.99 to 1.82) | 0.06 | 1.15 (1.00 to 1.33) | 0.05   | 1.30 (0.81 to 2.09) | 0.3    |

<sup>a</sup>) adjusted for age, sex, ethnicity, smoking, alcohol, Townsend quintile, BMI, SPB, falls & hip fracture, hip/knee ops, comorbidities (alcoholism, AF, treated hypertension, CKD, COPD, liver disease, CHD, CCF, any cancer, valvular, peptic ulcer), previous events (bleed, VTE, ischaemic stroke), medications at the baseline (macrolides, antiplatelets, anticonvulsant, corticosteroids, NSAIDs, statin, hormones), study year

<sup>b</sup>) insufficient data for analysis

<sup>c</sup>) based on patients without previous ischaemic stroke

<sup>d</sup>) based on patients without previous VTE

eTable 7 Patients with and without atrial fibrillation: Adjusted hazard ratios (95% CI) for outcomes associated with exposure to study drugs compared with apixaban, by database

| Comparison with apixaban            | With atrial fibrillation |         |                     |         | Without atrial fibrillation |         |                     |         |
|-------------------------------------|--------------------------|---------|---------------------|---------|-----------------------------|---------|---------------------|---------|
|                                     | QResearch                |         | CPRD                |         | QResearch                   |         | CPRD                |         |
|                                     | Adjusted HR (95%CI)      | P-value | Adjusted HR (95%CI) | P-value | Adjusted HR (95%CI)         | P-value | Adjusted HR (95%CI) | P-value |
| <b>Major bleeding</b>               |                          |         |                     |         |                             |         |                     |         |
| Dabigatran                          | 1.47 (1.12 to 1.92)      | 0.006   | 0.75 (0.39 to 1.43) | 0.4     | 1.60 (1.05 to 2.45)         | 0.03    | n/a <sup>b</sup>    |         |
| Rivaroxaban                         | 1.78 (1.44 to 2.20)      | <0.001  | 1.34 (0.82 to 2.17) | 0.2     | 1.55 (1.19 to 2.04)         | 0.001   | n/a <sup>b</sup>    |         |
| Warfarin                            | 1.62 (1.32 to 1.99)      | <0.001  | 1.10 (0.69 to 1.75) | 0.7     | 1.66 (1.27 to 2.16)         | <0.001  | n/a <sup>b</sup>    |         |
| <b>Intracranial bleed</b>           |                          |         |                     |         |                             |         |                     |         |
| Dabigatran                          | 1.12 (0.57 to 2.22)      | 0.7     | n/a <sup>b</sup>    |         | n/a <sup>b</sup>            |         | n/a <sup>b</sup>    |         |
| Rivaroxaban                         | 1.94 (1.19 to 3.16)      | 0.008   | n/a <sup>b</sup>    |         | 0.85 (0.47 to 1.53)         | 0.6     | n/a <sup>b</sup>    |         |
| Warfarin                            | 2.48 (1.57 to 3.94)      | <0.001  | n/a <sup>b</sup>    |         | 1.58 (0.93 to 2.69)         | 0.09    | n/a <sup>b</sup>    |         |
| <b>Haematuria</b>                   |                          |         |                     |         |                             |         |                     |         |
| Dabigatran                          | 1.39 (0.84 to 2.29)      | 0.2     | 0.81 (0.27 to 2.40) | 0.7     | 1.07 (0.46 to 2.46)         | 0.9     | n/a <sup>b</sup>    |         |
| Rivaroxaban                         | 1.78 (1.19 to 2.64)      | 0.005   | 1.33 (0.56 to 3.16) | 0.5     | 1.46 (0.89 to 2.41)         | 0.1     | n/a <sup>b</sup>    |         |
| Warfarin                            | 1.47 (1.00 to 2.17)      | 0.05    | 0.80 (0.34 to 1.84) | 0.6     | 1.37 (0.83 to 2.24)         | 0.2     | n/a <sup>b</sup>    |         |
| <b>All GI bleed</b>                 |                          |         |                     |         |                             |         |                     |         |
| Dabigatran                          | 1.51 (1.03 to 2.21)      | 0.03    | 0.96 (0.37 to 2.49) | 0.9     | 2.45 (1.36 to 4.39)         | 0.003   | n/a <sup>b</sup>    |         |
| Rivaroxaban                         | 1.64 (1.22 to 2.21)      | 0.001   | 1.39 (0.68 to 2.86) | 0.4     | 1.84 (1.23 to 2.75)         | 0.003   | n/a <sup>b</sup>    |         |
| Warfarin                            | 1.31 (0.98 to 1.75)      | 0.07    | 1.34 (0.68 to 2.65) | 0.4     | 1.78 (1.20 to 2.66)         | 0.005   | n/a <sup>b</sup>    |         |
| <b>Upper GI bleed</b>               |                          |         |                     |         |                             |         |                     |         |
| Dabigatran                          | 1.62 (1.10 to 2.38)      | 0.02    | 0.98 (0.36 to 2.69) | 1       | 2.26 (1.21 to 4.22)         | 0.01    | n/a <sup>b</sup>    |         |
| Rivaroxaban                         | 1.65 (1.21 to 2.24)      | 0.001   | 1.52 (0.72 to 3.23) | 0.3     | 1.86 (1.23 to 2.82)         | 0.003   | n/a <sup>b</sup>    |         |
| Warfarin                            | 1.29 (0.96 to 1.75)      | 0.09    | 1.43 (0.70 to 2.92) | 0.3     | 1.79 (1.18 to 2.71)         | 0.006   | n/a <sup>b</sup>    |         |
| <b>Ischaemic stroke<sup>c</sup></b> |                          |         |                     |         |                             |         |                     |         |
| Dabigatran                          | 1.02 (0.72 to 1.45)      | 0.9     | 0.78 (0.28 to 2.14) | 0.6     | 1.51 (0.87 to 2.65)         | 0.1     | n/a <sup>b</sup>    |         |
| Rivaroxaban                         | 0.82 (0.62 to 1.08)      | 0.2     | 1.53 (0.73 to 3.21) | 0.3     | 0.84 (0.58 to 1.22)         | 0.4     | n/a <sup>b</sup>    |         |
| Warfarin                            | 0.87 (0.67 to 1.12)      | 0.3     | 1.05 (0.51 to 2.15) | 0.9     | 0.86 (0.60 to 1.25)         | 0.4     | n/a <sup>b</sup>    |         |
| <b>VTE<sup>d</sup></b>              |                          |         |                     |         |                             |         |                     |         |
| Dabigatran                          | 0.50 (0.20 to 1.29)      | 0.2     | n/a <sup>b</sup>    |         | 0.36 (0.19 to 0.70)         | 0.003   | n/a <sup>b</sup>    |         |
| Rivaroxaban                         | 1.64 (0.96 to 2.80)      | 0.07    | 1.15 (0.40 to 3.29) | 0.8     | 3.41 (2.72 to 4.26)         | <0.001  | n/a <sup>b</sup>    |         |
| Warfarin                            | 1.22 (0.72 to 2.08)      | 0.5     | 1.01 (0.37 to 2.75) | 1       | 2.38 (1.88 to 3.03)         | <0.001  | n/a <sup>b</sup>    |         |

| <b>Mortality</b> |                     |     |                     |      |                     |        |                     |     |
|------------------|---------------------|-----|---------------------|------|---------------------|--------|---------------------|-----|
| Dabigatran       | 0.90 (0.76 to 1.06) | 0.2 | 0.77 (0.50 to 1.18) | 0.2  | 0.96 (0.74 to 1.24) | 0.8    | 1.17 (0.59 to 2.33) | 0.7 |
| Rivaroxaban      | 1.08 (0.96 to 1.22) | 0.2 | 0.88 (0.64 to 1.22) | 0.5  | 1.28 (1.12 to 1.46) | <0.001 | 1.35 (0.84 to 2.16) | 0.2 |
| Warfarin         | 0.91 (0.81 to 1.02) | 0.1 | 0.75 (0.55 to 1.01) | 0.06 | 0.87 (0.76 to 1.00) | 0.06   | 0.77 (0.48 to 1.23) | 0.3 |

<sup>a</sup>) adjusted for age, sex, ethnicity, smoking, alcohol, Townsend quintile, BMI, SPB, falls & hip fracture, hip/knee ops, comorbidities (alcoholism, AF, treated hypertension, CKD, COPD, liver disease, CHD, CCF, any cancer, valvular, peptic ulcer), previous events (bleed, VTE, ischaemic stroke), medications at the baseline (macrolides, antiplatelets, anticonvulsant, corticosteroids, NSAIDs, statin, hormones), study year

<sup>b</sup>) insufficient data for analysis

<sup>c</sup>) based on patients without previous ischaemic stroke

<sup>d</sup>) based on patients without previous VTE

eTable 8 Cause of death by drug and database, proportion of deceased patients on the drug

|                                             | QResearch               |                               |                                | CPRD                    |                               |                                |
|---------------------------------------------|-------------------------|-------------------------------|--------------------------------|-------------------------|-------------------------------|--------------------------------|
|                                             | Cause of death<br>Bleed | Cause of death<br>Stroke/ VTE | Cause of death<br>Other causes | Cause of death<br>Bleed | Cause of death<br>Stroke/ VTE | Cause of death<br>Other causes |
| <b>All patients</b>                         |                         |                               |                                |                         |                               |                                |
| Warfarin                                    | 5%                      | 5%                            | 89%                            | 4%                      | 8%                            | 88%                            |
| Dabigatran                                  | 2%                      | 6%                            | 92%                            | 0                       | 10%                           | 90%                            |
| Rivaroxaban                                 | 2%                      | 5%                            | 94%                            | 4%                      | 9%                            | 87%                            |
| Apixaban                                    | 1%                      | 4%                            | 95%                            | 4%                      | 13%                           | 83%                            |
|                                             |                         |                               |                                |                         |                               |                                |
| <b>Patients with atrial fibrillation</b>    |                         |                               |                                |                         |                               |                                |
| Warfarin                                    | 5%                      | 5%                            | 90%                            | 4%                      | 5%                            | 91%                            |
| Dabigatran                                  | 3%                      | 7%                            | 91%                            | 0                       | 8%                            | 92%                            |
| Rivaroxaban                                 | 2%                      | 5%                            | 92%                            | 5%                      | 9%                            | 86%                            |
| Apixaban                                    | 1%                      | 4%                            | 95%                            | 5%                      | 13%                           | 82%                            |
|                                             |                         |                               |                                |                         |                               |                                |
| <b>Patients without atrial fibrillation</b> |                         |                               |                                |                         |                               |                                |
| Warfarin                                    | 5%                      | 6%                            | 89%                            | 4%                      | 12%                           | 84%                            |
| Dabigatran                                  | 3%                      | 4%                            | 95%                            | 0                       | 14%                           | 86%                            |
| Rivaroxaban                                 | 1%                      | 4%                            | 95%                            | 3%                      | 8%                            | 88%                            |
| Apixaban                                    | 1%                      | 4%                            | 95%                            | 0                       | 14%                           | 86%                            |

Note: The percentages do not always total 100% because a few patients had records of both bleeding and stroke/VTE as cause of death and also because of rounded numbers. Because of the low numbers of deaths only percentage is provided due to the Data Protection Act.

eTable 9 Patients with and without atrial fibrillation: Cohort characteristics by database, percentage (number) of patients on lower and higher doses for DOAC's

|                                                    | With atrial fibrillation |                    |                    |                    | Without atrial fibrillation |                    |                   |                   |
|----------------------------------------------------|--------------------------|--------------------|--------------------|--------------------|-----------------------------|--------------------|-------------------|-------------------|
|                                                    | QResearch                |                    | CPRD               |                    | QResearch                   |                    | CPRD              |                   |
|                                                    | Lower dose               | Higher dose        | Lower dose         | Higher dose        | Lower dose                  | Higher dose        | Lower dose        | Higher dose       |
| Total Number of patients                           | 8090                     | 19240              | 1644               | 3711               | 6694                        | 20729              | 1305              | 2417              |
| <b>Anticoagulant</b>                               |                          |                    |                    |                    |                             |                    |                   |                   |
| Dabigatran                                         | 29.4 (2378)              | 11.2 (2156)        | 33.1 (544)         | 12.4 (459)         | 18.3 (1224)                 | 3.1 (644)          | 18.1 (236)        | 4.3 (103)         |
| Rivaroxaban                                        | 31.0 (2511)              | 57.6 (11086)       | 34.5 (568)         | 64.2 (2382)        | 45.7 (3056)                 | 74.1 (15367)       | 66.1 (862)        | 84.0 (2031)       |
| Apixaban                                           | 39.6 (3201)              | 31.2 (5998)        | 32.4 (532)         | 23.4 (870)         | 36.1 (2414)                 | 22.8 (4718)        | 15.9 (207)        | 11.7 (283)        |
| Median (interquartile range) for days of treatment | 214<br>(79 to 458)       | 249<br>(90 to 473) | 156<br>(60 to 332) | 152<br>(63 to 319) | 62<br>(47 to 1647)          | 101<br>(51 to 202) | 58<br>(38 to 100) | 99<br>(49 to 205) |
| <b>Gender</b>                                      |                          |                    |                    |                    |                             |                    |                   |                   |
| Men                                                | 42.0 (3396)              | 59.2 (11388)       | 44.4 (730)         | 60.7 (2252)        | 41.0 (2745)                 | 52.7 (10921)       | 43.4 (566)        | 50.8 (1228)       |
| Women                                              | 58.0 (4694)              | 40.8 (7852)        | 55.6 (914)         | 39.3 (1459)        | 59.0 (3949)                 | 47.3 (9808)        | 56.6 (739)        | 49.2 (1189)       |
| Mean age at baseline                               | 82.9 (8.1)               | 72.9 (10.5)        | 81.9 (8.6)         | 73.0 (10.6)        | 76.0 (13.7)                 | 67.9 (15.2)        | 71.6 (15.8)       | 66.6 (15.8)       |
|                                                    |                          |                    |                    |                    |                             |                    |                   |                   |
| BMI recorded                                       | 95.1 (7697)              | 96.1 (18490)       | 95.5 (1570)        | 96.4 (3576)        | 95.0 (6358)                 | 94.2 (19536)       | 94.9 (1238)       | 94.7 (2290)       |
| Mean BMI in kg/m <sup>2</sup> (SD)                 | 26.9 (5.3)               | 28.9 (5.6)         | 26.8 (5.7)         | 28.8 (5.8)         | 27.9 (5.6)                  | 29.1 (5.9)         | 28.0 (5.9)        | 28.7 (6.2)        |
|                                                    |                          |                    |                    |                    |                             |                    |                   |                   |
| <b>Smoking</b>                                     |                          |                    |                    |                    |                             |                    |                   |                   |
| Non-smoker                                         | 56.3 (4556)              | 51.5 (9907)        | 56.1 (923)         | 51.0 (1893)        | 55.2 (3696)                 | 50.1 (10389)       | 54.9 (716)        | 49.0 (1184)       |
| Ex-smoker                                          | 38.3 (3098)              | 40.1 (7718)        | 38.4 (632)         | 41.1 (1526)        | 35.9 (2405)                 | 35.6 (7386)        | 34.3 (448)        | 36.3 (877)        |
| Current smoker                                     | 5.2 (422)                | 8.3 (1594)         | 5.4 (88)           | 7.8 (288)          | 8.6 (576)                   | 13.9 (2877)        | 10.6 (138)        | 14.4 (348)        |
| <b>Alcohol consumption</b>                         |                          |                    |                    |                    |                             |                    |                   |                   |
| Recorded                                           | 93.6 (7571)              | 94.5 (18190)       | 93.1 (1531)        | 94.0 (3490)        | 92.5 (6194)                 | 91.6 (18996)       | 90.7 (1184)       | 90.5 (2188)       |
| Non-drinker                                        | 42.7 (3456)              | 30.2 (5816)        | 40.0 (657)         | 28.9 (1074)        | 40.4 (2707)                 | 33.9 (7017)        | 36.2 (473)        | 31.9 (772)        |
| Trivial (< 1 unit per day)                         | 26.9 (2179)              | 26.5 (5094)        | 31.0 (509)         | 30.6 (1136)        | 27.5 (1841)                 | 27.2 (5633)        | 31.5 (411)        | 31.0 (749)        |
| Light (1-2 units per day)                          | 11.5 (927)               | 14.5 (2781)        | 13.9 (229)         | 18.1 (673)         | 11.6 (775)                  | 13.1 (2710)        | 13.6 (178)        | 16.2 (392)        |
| Moderate (3-6 units/day)                           | 11.4 (920)               | 20.2 (3891)        | 4.2 (69)           | 8.0 (297)          | 11.6 (779)                  | 14.9 (3098)        | 6.2 (81)          | 6.4 (154)         |
| Heavy (7-9 units/day)                              | 0.7 (58)                 | 2.0 (392)          | 3.0 (49)           | 5.5 (203)          | 0.8 (55)                    | 1.5 (304)          | 1.7 (22)          | 2.9 (71)          |

|                           |             |             |            |             |             |             |            |            |
|---------------------------|-------------|-------------|------------|-------------|-------------|-------------|------------|------------|
| Very heavy (>9 units/day) | 0.4 (31)    | 1.1 (216)   | 1.1 (18)   | 2.9 (107)   | 0.6 (37)    | 1.1 (234)   | 1.5 (19)   | 2.1 (50)   |
| Not recorded              | 6.4 (519)   | 5.5 (1050)  | 6.9 (113)  | 6.0 (221)   | 7.5 (500)   | 8.4 (1733)  | 9.3 (121)  | 9.5 (229)  |
| <b>Townsend quintiles</b> |             |             |            |             |             |             |            |            |
| 1 (Affluent)              | 20.9 (1693) | 22.6 (4348) | 27.1 (446) | 29.0 (1077) | 20.3 (1358) | 20.0 (4140) | 26.9 (351) | 23.7 (572) |
| 2                         | 20.8 (1684) | 23.0 (4420) | 25.5 (419) | 27.1 (1007) | 20.6 (1380) | 20.8 (4316) | 25.5 (333) | 25.5 (617) |
| 3                         | 20.9 (1691) | 20.9 (4017) | 19.9 (327) | 20.7 (768)  | 21.3 (1429) | 21.5 (4453) | 21.1 (275) | 21.3 (514) |
| 4                         | 20.5 (1662) | 18.4 (3534) | 16.7 (274) | 15.1 (560)  | 19.7 (1317) | 20.4 (4226) | 17.9 (233) | 18.6 (449) |
| 5 (Deprived)              | 16.8 (1360) | 15.2 (2921) | 10.8 (178) | 8.1 (299)   | 18.1 (1210) | 17.3 (3594) | 8.7 (113)  | 10.9 (264) |

eTable 10 **Patients with and without atrial fibrillation: Comorbidities, previous events and other medications, percentage (number) of patients on lower and higher doses for DOAC's.**

|                                         | With atrial fibrillation |              |             |             | Without atrial fibrillation |             |            |             |
|-----------------------------------------|--------------------------|--------------|-------------|-------------|-----------------------------|-------------|------------|-------------|
|                                         | QResearch                |              | CPRD        |             | QResearch                   |             | CPRD       |             |
| Total N                                 | Lower dose               | Higher dose  | Lower dose  | Higher dose | Lower dose                  | Higher dose | Lower dose | Higher dose |
| <b>Comorbidities at baseline</b>        |                          |              |             |             |                             |             |            |             |
| Alcohol dependence                      | 2.1 (171)                | 3.4 (646)    | 1.9 (32)    | 3.4 (128)   | 2.2 (146)                   | 3.6 (738)   | 2.5 (32)   | 3.6 (88)    |
| Bleeding disorders                      | 1.2 (101)                | 0.9 (175)    | 1.8 (30)    | 1.2 (43)    | 1.2 (82)                    | 1.1 (226)   | 1.5 (20)   | 1.7 (41)    |
| Cancer (any)                            | 15.4 (1245)              | 12.1 (2333)  | 14.1 (231)  | 11.9 (442)  | 14.5 (968)                  | 12.5 (2591) | 14.1 (184) | 13.3 (321)  |
| Chronic liver disease or pancreatitis   | 1.5 (122)                | 1.3 (247)    | 1.3 (22)    | 1.5 (54)    | 1.2 (82)                    | 1.3 (264)   | 1.3 (17)   | 1.7 (42)    |
| Chronic obstructive pulmonary disease   | 11.2 (906)               | 8.9 (1710)   | 10.1 (166)  | 8.9 (331)   | 8.5 (568)                   | 8.5 (1754)  | 6.9 (90)   | 8.6 (209)   |
| Chronic renal disease                   | 4.2 (336)                | 0.7 (128)    | 4.1 (68)    | 0.9 (34)    | 3.1 (209)                   | 1.0 (213)   | 3.3 (43)   | 1.1 (26)    |
| Congestive cardiac failure              | 16.7 (1355)              | 9.7 (1873)   | 17.0 (280)  | 9.8 (364)   | 9.1 (608)                   | 5.1 (1060)  | 6.5 (85)   | 5.5 (132)   |
| Coronary heart disease                  | 28.9 (2335)              | 20.3 (3901)  | 27.4 (451)  | 20.3 (754)  | 20.8 (1393)                 | 14.7 (3053) | 17.6 (230) | 15.0 (363)  |
| Diabetes                                | 20.1 (1629)              | 17.5 (3362)  | 19.9 (327)  | 17.2 (637)  | 18.0 (1208)                 | 16.0 (3315) | 16.2 (212) | 13.8 (333)  |
| Dyspepsia                               | 19.2 (1557)              | 18.4 (3542)  | 27.3 (449)  | 25.6 (949)  | 17.8 (1193)                 | 17.3 (3588) | 26.4 (345) | 24.3 (588)  |
| Falls or hip fracture (within 180 days) | 12.3 (995)               | 5.7 (1098)   | 9.5 (157)   | 4.9 (183)   | 17.9 (1195)                 | 5.5 (1132)  | 7.9 (103)  | 4.9 (118)   |
| Hip or knee operation (within 180 days) | 1.3 (102)                | 0.7 (128)    | 2.4 (39)    | 1.3 (49)    | 22.6 (1513)                 | 2.4 (496)   | 21.9 (286) | 3.6 (88)    |
| Hypertension                            | 66.2 (5354)              | 57.0 (10958) | 69.6 (1144) | 58.5 (2171) | 52.2 (3497)                 | 41.2 (8539) | 49.5 (646) | 42.0 (1014) |
| Ischaemic stroke*                       | 26.1 (2115)              | 17.0 (3265)  | 29.1 (478)  | 19.8 (736)  | 19.0 (1272)                 | 12.9 (2680) | 15.6 (204) | 14.4 (348)  |
| Oesophageal varices                     | 0.1 (9)                  | 0.1 (19)     | <5          | <5          | 0.1 (4)                     | 0.1 (24)    | <5         | <5          |
| Peptic ulcer                            | 9.4 (757)                | 6.9 (1322)   | 10.0 (164)  | 8.4 (310)   | 7.3 (486)                   | 5.8 (1198)  | 7.8 (102)  | 6.5 (158)   |
| Valvular heart disease                  | 12.6 (1022)              | 8.2 (1572)   | 9.9 (162)   | 6.3 (233)   | 7.0 (471)                   | 4.5 (934)   | 4.8 (63)   | 3.9 (94)    |
| Venous thromboembolism*                 | 5.1 (412)                | 4.9 (940)    | 8.3 (137)   | 5.9 (219)   | 13.2 (883)                  | 37.4 (7747) | 27.3 (356) | 46.0 (1112) |
|                                         |                          |              |             |             |                             |             |            |             |
| <b>Previous bleed (any)*</b>            | 29.4 (2375)              | 25.1 (4835)  | 31.7 (521)  | 28.6 (1061) | 24.8 (1659)                 | 23.0 (4763) | 27.8 (363) | 26.5 (641)  |
| Previous Intracranial bleed*            | 1.8 (142)                | 1.0 (201)    | 2.4 (40)    | 1.3 (50)    | 1.4 (94)                    | 1.1 (221)   | 2.1 (28)   | 1.4 (35)    |
| Previous Haematuria                     | 13.9 (1122)              | 11.6 (2236)  | 13.7 (226)  | 11.0 (408)  | 10.0 (668)                  | 9.7 (2009)  | 9.6 (125)  | 9.5 (229)   |
| Previous Haemoptysis*                   | 2.5 (203)                | 2.7 (514)    | 2.9 (48)    | 3.4 (128)   | 2.4 (158)                   | 2.7 (551)   | 3.8 (50)   | 4.1 (100)   |
| Previous All GI bleed*                  | 15.5 (1255)              | 13.5 (2598)  | 18.2 (299)  | 16.9 (629)  | 14.2 (952)                  | 12.7 (2636) | 16.2 (211) | 15.2 (367)  |
| Previous upper GI bleed*                | 6.1 (491)                | 4.3 (823)    | 6.8 (111)   | 5.6 (208)   | 5.1 (341)                   | 4.0 (837)   | 6.2 (81)   | 5.8 (141)   |



|                          |             |              |            |             |             |             |            |            |
|--------------------------|-------------|--------------|------------|-------------|-------------|-------------|------------|------------|
| Previous Rectal bleed*   | 10.9 (882)  | 10.3 (1988)  | 13.4 (220) | 13.1 (485)  | 10.4 (698)  | 9.8 (2029)  | 12.3 (161) | 11.1 (268) |
| <b>Other medications</b> |             |              |            |             |             |             |            |            |
| Proton Pump Inhibitors   | 48.0 (3882) | 40.4 (7764)  | 45.3 (745) | 40.6 (1506) | 47.6 (3185) | 39.2 (8132) | 44.3 (578) | 40.7 (983) |
| Antibiotics <sup>#</sup> | 9.1 (735)   | 6.7 (1298)   | 7.6 (125)  | 6.6 (246)   | 8.4 (560)   | 7.6 (1575)  | 8.4 (110)  | 9.5 (230)  |
| Antiplatelet             | 24.0 (1943) | 17.7 (3408)  | 39.6 (651) | 30.3 (1124) | 20.5 (1374) | 16.0 (3316) | 23.7 (309) | 18.0 (434) |
| Antidepressants          | 17.8 (1443) | 14.9 (2871)  | 18.0 (296) | 15.7 (583)  | 21.0 (1409) | 21.5 (4466) | 23.5 (307) | 22.2 (536) |
| Anticonvulsants          | 0.7 (56)    | 0.6 (118)    | 0.7 (11)   | 0.9 (32)    | 0.9 (62)    | 1.2 (242)   | 0.9 (12)   | 1.4 (34)   |
| NSAIDs                   | 5.5 (447)   | 7.6 (1456)   | 5.1 (84)   | 7.5 (279)   | 16.1 (1076) | 10.1 (2085) | 17.9 (234) | 10.1 (245) |
| Corticosteroids          | 12.2 (986)  | 9.8 (1884)   | 10.5 (172) | 9.1 (337)   | 10.1 (678)  | 10.1 (2098) | 10.6 (138) | 11.7 (282) |
| Statins                  | 52.7 (4265) | 52.5 (10110) | 53.0 (872) | 52.6 (1953) | 44.6 (2987) | 39.0 (8092) | 39.8 (519) | 36.7 (888) |
| Hormones (women)         | 1.0 (46)    | 1.9 (147)    | 1.2 (11)   | 3.8 (55)    | 2.1 (84)    | 2.6 (251)   | 5.8 (43)   | 8.7 (104)  |

\*) Based on GP and HES records

#) In the last 6 months prior to the drug start date

eTable 11 **Patients with atrial fibrillation**: Rates per 1000py of outcomes by drug and dose for DOAC's and adjusted hazard ratios with reference to **warfarin** in QResearch and CPRD

| With reference to warfarin | QResearch    |             |                                          |                                             | CPRD         |             |                                          |                                             |
|----------------------------|--------------|-------------|------------------------------------------|---------------------------------------------|--------------|-------------|------------------------------------------|---------------------------------------------|
|                            | Person-years | N of events | Age-sex adjusted rate per 1000py (95%CI) | Adjusted hazard ratios (95%CI) <sup>a</sup> | Person-years | N of events | Age-sex adjusted rate per 1000py (95%CI) | Adjusted hazard ratios (95%CI) <sup>a</sup> |
| <b>Major bleeding</b>      |              |             |                                          |                                             |              |             |                                          |                                             |
| Dabigatran <300            | 2422         | 67          | 25.4 (18.0 to 32.7)                      | 0.97 (0.76 to 1.24)                         | 483          | 12          | 26.6 (7.5 to 45.8)                       | 0.74 (0.41 to 1.32)                         |
| Dabigatran 300+            | 2360         | 36          | 25.9 (2.5 to 49.4)                       | 0.79 (0.56 to 1.10)                         | 346          | <5          | 5.7 (0.0 to 12.2)                        | n/a                                         |
| Rivaroxaban <20            | 2046         | 79          | 36.0 (24.0 to 48.1)                      | 1.26 (1.00 to 1.60)                         | 335          | 15          | 42.7 (14.6 to 70.8)                      | 1.18 (0.69 to 2.02)                         |
| Rivaroxaban 20+            | 9836         | 242         | 25.2 (22.0 to 28.4)                      | 1.05 (0.91 to 1.22)                         | 1439         | 43          | 31.9 (22.3 to 41.5)                      | 1.08 (0.77 to 1.52)                         |
| Apixaban <10               | 2396         | 50          | 28.4 (13.3 to 43.5)                      | 0.67 (0.50 to 0.91)*                        | 267          | 8           | 48.5 (0.0 to 102.7)                      | 0.73 (0.36 to 1.52)                         |
| Apixaban 10+               | 4749         | 62          | 13.4 (9.9 to 17.0)                       | 0.56 (0.43 to 0.73)*                        | 477          | 13          | 31.0 (12.8 to 49.2)                      | 1.02 (0.57 to 1.82)                         |
| <b>Intracranial bleed</b>  |              |             |                                          |                                             |              |             |                                          |                                             |
| Dabigatran <300            | 2465         | 10          | 3.3 (1.0 to 5.6)                         | 0.48 (0.26 to 0.91)                         | 489          | 0           | -                                        | n/a <sup>b</sup>                            |
| Dabigatran 300+            | 2400         | <5          | 7.6 (0.0 to 20.3)                        | n/a <sup>b</sup>                            | 348          | <5          | 1.4 (0.0 to 4.2)                         | n/a <sup>b</sup>                            |
| Rivaroxaban <20            | 2077         | 17          | 7.8 (3.3 to 12.3)                        | 0.86 (0.52 to 1.42)                         | 339          | <5          | 12.3 (0.0 to 26.0)                       | n/a <sup>b</sup>                            |
| Rivaroxaban 20+            | 9946         | 47          | 5.0 (3.6 to 6.5)                         | 0.79 (0.57 to 1.09)                         | 1453         | 9           | 6.6 (2.2 to 10.9)                        | 1.24 (0.59 to 2.61)                         |
| Apixaban <10               | 2408         | 11          | 2.8 (0.0 to 5.6)                         | 0.44 (0.23 to 0.82)*                        | 268          | 0           | -                                        | n/a <sup>b</sup>                            |
| Apixaban 10+               | 4769         | 11          | 2.8 (1.0 to 4.5)                         | 0.41 (0.22 to 0.76)*                        | 481          | <5          | 10.3 (0.0 to 21.7)                       | n/a <sup>b</sup>                            |
| <b>Haematuria</b>          |              |             |                                          |                                             |              |             |                                          |                                             |
| Dabigatran <300            | 2439         | 19          | 7.9 (3.5 to 12.3)                        | 1.04 (0.65 to 1.65)                         | 486          | 5           | 15.8 (0.0 to 33.0)                       | 1.26 (0.51 to 3.12)                         |
| Dabigatran 300+            | 2391         | 11          | 2.7 (1.1 to 4.4)                         | 0.71 (0.39 to 1.30)                         | 348          | 0           | -                                        | n/a <sup>b</sup>                            |
| Rivaroxaban <20            | 2060         | 23          | 14.4 (5.7 to 23.1)                       | 1.64 (1.06 to 2.55)                         | 336          | <5          | 8.9 (0.1 to 17.8)                        | n/a <sup>b</sup>                            |
| Rivaroxaban 20+            | 9910         | 72          | 7.3 (5.6 to 9.1)                         | 1.10 (0.83 to 1.44)                         | 1447         | 15          | 10.8 (5.3 to 16.3)                       | 1.57 (0.86 to 2.88)                         |
| Apixaban <10               | 2405         | 13          | 8.4 (0.0 to 17.1)                        | 0.84 (0.47 to 1.50)                         | 267          | <5          | 18.5 (0.0 to 49.0)                       | n/a <sup>b</sup>                            |
| Apixaban 10+               | 4765         | 16          | 3.3 (1.7 to 5.0)                         | 0.51 (0.30 to 0.85)                         | 480          | <5          | 5.3 (0.0 to 11.2)                        | n/a <sup>b</sup>                            |
| <b>All GI bleed</b>        |              |             |                                          |                                             |              |             |                                          |                                             |
| Dabigatran <300            | 2449         | 38          | 13.9 (8.6 to 19.1)                       | 1.37 (0.98 to 1.91)                         | 487          | 6           | 8.4 (1.4 to 15.4)                        | 0.83 (0.37 to 1.89)                         |
| Dabigatran 300+            | 2385         | 15          | 13.6 (0.0 to 33.1)                       | 0.86 (0.51 to 1.44)                         | 346          | <5          | 4.3 (0.0 to 10.2)                        | n/a <sup>b</sup>                            |
| Rivaroxaban <20            | 2068         | 38          | 13.0 (6.3 to 19.7)                       | 1.38 (0.98 to 1.95)                         | 338          | 8           | 23.5 (0.2 to 46.8)                       | 1.17 (0.56 to 2.46)                         |
| Rivaroxaban 20+            | 9893         | 110         | 11.4 (9.3 to 13.5)                       | 1.20 (0.96 to 1.50)                         | 1447         | 18          | 13.5 (7.2 to 19.8)                       | 0.86 (0.51 to 1.44)                         |
| Apixaban <10               | 2404         | 23          | 12.8 (3.6 to 21.9)                       | 0.70 (0.45 to 1.09)                         | 268          | <5          | 28.1 (0.0 to 72.7)                       | n/a <sup>b</sup>                            |
| Apixaban 10+               | 4755         | 36          | 7.6 (4.9 to 10.2)                        | 0.81 (0.56 to 1.16)                         | 479          | 6           | 15.3 (2.4 to 28.1)                       | 0.85 (0.36 to 1.99)                         |
| <b>Upper GI bleed</b>      |              |             |                                          |                                             |              |             |                                          |                                             |

|                                     |      |     |                      |                      |      |    |                       |                      |
|-------------------------------------|------|-----|----------------------|----------------------|------|----|-----------------------|----------------------|
| Dabigatran <300                     | 2449 | 38  | 13.9 (8.6 to 19.1)   | 1.49 (1.06 to 2.08)  | 487  | 6  | 8.4 (1.4 to 15.4)     | 0.91 (0.40 to 2.06)  |
| Dabigatran 300+                     | 2385 | 14  | 13.4 (0.0 to 32.9)   | 0.90 (0.53 to 1.54)  | 347  | <5 | 2.0 (0.0 to 5.8)      | n/a <sup>b</sup>     |
| Rivaroxaban <20                     | 2070 | 35  | 12.4 (5.8 to 19.0)   | 1.34 (0.94 to 1.92)  | 338  | 8  | 23.5 (0.2 to 46.8)    | 1.23 (0.59 to 2.60)  |
| Rivaroxaban 20+                     | 9900 | 104 | 10.8 (8.7 to 12.9)   | 1.23 (0.98 to 1.55)  | 1447 | 17 | 12.7 (6.6 to 18.8)    | 0.86 (0.50 to 1.47)  |
| Apixaban <10                        | 2404 | 21  | 11.4 (2.6 to 20.1)   | 0.68 (0.43 to 1.08)  | 268  | <5 | 28.1 (0.0 to 72.7)    | n/a <sup>b</sup>     |
| Apixaban 10+                        | 4757 | 34  | 7.2 (4.6 to 9.8)     | 0.83 (0.57 to 1.21)  | 480  | 5  | 13.2 (1.0 to 25.4)    | 0.75 (0.29 to 1.88)  |
| <b>Ischaemic stroke<sup>c</sup></b> |      |     |                      |                      |      |    |                       |                      |
| Dabigatran <300                     | 1686 | 32  | 15.8 (9.3 to 22.3)   | 1.11 (0.77 to 1.59)  | 327  | 5  | 12.2 (0.4 to 23.9)    | 0.82 (0.34 to 2.02)  |
| Dabigatran 300+                     | 1889 | 26  | 10.5 (6.3 to 14.8)   | 1.37 (0.92 to 2.05)  | 276  | <5 | 3.7 (0.0 to 9.3)      | n/a <sup>b</sup>     |
| Rivaroxaban <20                     | 1560 | 32  | 17.9 (9.2 to 26.7)   | 1.13 (0.78 to 1.63)  | 231  | 10 | 32.7 (10.1 to 55.3)   | 1.87 (0.95 to 3.69)  |
| Rivaroxaban 20+                     | 8226 | 91  | 11.5 (9.1 to 13.9)   | 0.90 (0.71 to 1.14)  | 1147 | 23 | 20.4 (11.9 to 28.8)   | 1.33 (0.82 to 2.16)  |
| Apixaban <10                        | 1675 | 36  | 19.6 (7.7 to 31.4)   | 1.16 (0.81 to 1.67)  | 174  | <5 | 17.9 (0.0 to 41.3)    | n/a <sup>b</sup>     |
| Apixaban 10+                        | 3677 | 45  | 11.9 (8.3 to 15.6)   | 1.09 (0.78 to 1.51)  | 340  | 5  | 21.1 (0.4 to 41.9)    | 0.97 (0.38 to 2.46)  |
| <b>VTE<sup>d</sup></b>              |      |     |                      |                      |      |    |                       |                      |
| Dabigatran <300                     | 2355 | <5  | 2.2 (0.0 to 5.5)     | n/a <sup>b</sup>     | 461  | 0  | -                     | n/a <sup>b</sup>     |
| Dabigatran 300+                     | 2352 | <5  | 0.8 (0.0 to 1.8)     | n/a <sup>b</sup>     | 329  | <5 | 3.3 (0.0 to 9.9)      | n/a <sup>b</sup>     |
| Rivaroxaban <20                     | 1961 | 7   | 2.5 (0.3 to 4.7)     | 0.80 (0.35 to 1.87)  | 304  | <5 | 3.5 (0.0 to 8.6)      | n/a <sup>b</sup>     |
| Rivaroxaban 20+                     | 9444 | 41  | 4.7 (3.2 to 6.1)     | 1.14 (0.73 to 1.79)  | 1357 | 9  | 7.2 (2.5 to 12.0)     | 1.10 (0.50 to 2.40)  |
| Apixaban <10                        | 2312 | 8   | 5.6 (0.0 to 13.3)    | 0.86 (0.38 to 1.95)  | 249  | <5 | 1                     | n/a <sup>b</sup>     |
| Apixaban 10+                        | 4606 | 10  | 2.4 (0.8 to 4.1)     | 0.69 (0.32 to 1.47)  | 453  | <5 | 6.0 (0.0 to 12.8)     | n/a <sup>b</sup>     |
| <b>Mortality</b>                    |      |     |                      |                      |      |    |                       |                      |
| Dabigatran <300                     | 2466 | 165 | 45.6 (37.6 to 53.7)  | 1.03 (0.88 to 1.21)  | 489  | 25 | 47.8 (25.9 to 69.8)   | 0.90 (0.60 to 1.35)  |
| Dabigatran 300+                     | 2401 | 39  | 74.9 (3.3 to 146.4)  | 0.78 (0.57 to 1.08)  | 348  | 11 | 23.3 (8.3 to 38.2)    | 1.50 (0.82 to 2.74)  |
| Rivaroxaban <20                     | 2078 | 251 | 91.2 (64.9 to 117.5) | 1.28 (1.11 to 1.47)* | 339  | 40 | 77.1 (48.3 to 105.8)  | 1.41 (1.00 to 1.98)  |
| Rivaroxaban 20+                     | 9953 | 440 | 47.0 (42.6 to 51.4)  | 1.11 (1.00 to 1.24)  | 1454 | 62 | 43.7 (32.7 to 54.8)   | 1.00 (0.75 to 1.33)  |
| Apixaban <10                        | 2410 | 292 | 80.2 (64.8 to 95.6)  | 1.23 (1.08 to 1.41)* | 268  | 37 | 104.3 (51.6 to 157.0) | 1.62 (1.13 to 2.33)* |
| Apixaban 10+                        | 4770 | 167 | 43.8 (36.8 to 50.8)  | 0.98 (0.83 to 1.15)  | 481  | 18 | 45.9 (23.3 to 68.5)   | 0.99 (0.61 to 1.61)  |

<sup>a</sup>) adjusted for age, sex, ethnicity, smoking, alcohol, Townsend quintile, BMI, SPB, falls&hipfracture, hip/knee ops, comorbidities (alcoholism, AF, treated hypertension, CKD, COPD, liver disease, CHD, CCF, any cancer, valvular, peptic ulcer), previous events (bleed, VTE, ischaemic stroke), medications at the baseline (macrolides, antiplatelets, anticonvulsant, corticosteroids, NSAIDs, statin, hormones), study year

<sup>b</sup>) insufficient data for analysis

<sup>c</sup>) based on patients without previous ischaemic stroke

<sup>d</sup>) based on patients without previous VTE

\*) P-value<0.01

eTable 12 **Patients without atrial fibrillation**: Rates per 1000py of outcomes by drug and dose for DOAC's and adjusted hazard ratios with reference to **warfarin** in QResearch and CPRD

|                           | QResearch    |             |                                          |                                             | CPRD         |             |                                          |                                             |
|---------------------------|--------------|-------------|------------------------------------------|---------------------------------------------|--------------|-------------|------------------------------------------|---------------------------------------------|
|                           | Person-years | N of events | Age-sex adjusted rate per 1000py (95%CI) | Adjusted hazard ratios (95%CI) <sup>a</sup> | Person-years | N of events | Age-sex adjusted rate per 1000py (95%CI) | Adjusted hazard ratios (95%CI) <sup>a</sup> |
| <b>Major bleeding</b>     |              |             |                                          |                                             |              |             |                                          |                                             |
| Dabigatran <300           | 609          | 24          | 38.0 (12.9 to 63.0)                      | 1.16 (0.77 to 1.75)                         | 97           | <5          | 4.4 (0.0 to 13.1)                        | n/a <sup>b</sup>                            |
| Dabigatran 300+           | 487          | 9           | 26.1 (0.0 to 53.5)                       | 0.73 (0.38 to 1.41)                         | 72           | 5           | 115.0 (0.0 to 236.1)                     | 3.00 (1.21 to 7.41)                         |
| Rivaroxaban <20           | 996          | 39          | 37.9 (24.1 to 51.7)                      | 1.03 (0.74 to 1.44)                         | 201          | 11          | 44.1 (14.6 to 73.6)                      | 1.34 (0.72 to 2.50)                         |
| Rivaroxaban 20+           | 6750         | 188         | 28.2 (24.1 to 32.2)                      | 0.91 (0.76 to 1.09)                         | 841          | 25          | 29.7 (18.0 to 41.5)                      | 0.89 (0.57 to 1.40)                         |
| Apixaban <10              | 1044         | 36          | 22.6 (10.6 to 34.5)                      | 0.82 (0.57 to 1.17)                         | 76           | <5          | 7.4 (0.0 to 18.9)                        | n/a <sup>b</sup>                            |
| Apixaban 10+              | 2083         | 34          | 15.7 (10.1 to 21.3)                      | 0.49 (0.34 to 0.71)*                        | 133          | <5          | 7.0 (0.0 to 20.8)                        | n/a <sup>b</sup>                            |
| <b>Intracranial bleed</b> |              |             |                                          |                                             |              |             |                                          |                                             |
| Dabigatran <300           | 615          | <5          | 3.9 (0.0 to 8.2)                         | n/a <sup>b</sup>                            | 97           | <5          | 4.4 (0.0 to 13.1)                        | n/a <sup>b</sup>                            |
| Dabigatran 300+           | 489          | 0           | -                                        | n/a <sup>b</sup>                            | 73           | 0           | -                                        | n/a <sup>b</sup>                            |
| Rivaroxaban <20           | 1003         | 11          | 13.7 (5.1 to 22.3)                       | 1.27 (0.67 to 2.40)                         | 203          | <5          | 3.9 (0.0 to 9.5)                         | n/a <sup>b</sup>                            |
| Rivaroxaban 20+           | 6825         | 18          | 2.7 (1.4 to 3.9)                         | 0.42 (0.25 to 0.70)*                        | 850          | <5          | 2.0 (0.0 to 4.9)                         | n/a <sup>b</sup>                            |
| Apixaban <10              | 1056         | 11          | 5.5 (1.3 to 9.7)                         | 0.92 (0.47 to 1.78)                         | 76           | 0           | -                                        | n/a <sup>b</sup>                            |
| Apixaban 10+              | 2094         | 8           | 3.6 (1.1 to 6.2)                         | 0.49 (0.23 to 1.03)                         | 133          | 0           | -                                        | n/a <sup>b</sup>                            |
| <b>Haematuria</b>         |              |             |                                          |                                             |              |             |                                          |                                             |
| Dabigatran <300           | 612          | <5          | 5.6 (0.0 to 11.4)                        | n/a <sup>b</sup>                            | 98           | 0           | -                                        | n/a <sup>b</sup>                            |
| Dabigatran 300+           | 488          | <5          | 18.6 (0.0 to 45.3)                       | n/a <sup>b</sup>                            | 73           | <5          | 13.8 (0.0 to 40.7)                       | n/a <sup>b</sup>                            |
| Rivaroxaban <20           | 1001         | 13          | 14.3 (5.9 to 22.6)                       | 1.42 (0.79 to 2.54)                         | 201          | <5          | 12.1 (0.2 to 23.9)                       | n/a <sup>b</sup>                            |
| Rivaroxaban 20+           | 6795         | 53          | 8.0 (5.8 to 10.2)                        | 0.97 (0.69 to 1.35)                         | 847          | 5           | 6.3 (0.7 to 11.9)                        | 0.80 (0.30 to 2.14)                         |
| Apixaban <10              | 1054         | 9           | 5.6 (0.7 to 10.4)                        | 0.95 (0.47 to 1.93)                         | 76           | <5          | 1.8 (0.0 to 5.2)                         | n/a <sup>b</sup>                            |
| Apixaban 10+              | 2091         | 11          | 4.4 (1.8 to 7.1)                         | 0.62 (0.32 to 1.18)                         | 133          | <5          | 7.0 (0.0 to 20.7)                        | n/a <sup>b</sup>                            |
| <b>All GI bleed</b>       |              |             |                                          |                                             |              |             |                                          |                                             |
| Dabigatran <300           | 612          | 14          | 24.0 (1.0 to 46.9)                       | 1.59 (0.92 to 2.74)                         | 98           | 0           | -                                        | n/a <sup>b</sup>                            |
| Dabigatran 300+           | 488          | 5           | 7.4 (0.7 to 14.0)                        | 1.05 (0.43 to 2.57)                         | 72           | <5          | 101.6 (0.0 to 220.3)                     | n/a <sup>b</sup>                            |
| Rivaroxaban <20           | 1001         | 14          | 8.6 (2.8 to 14.4)                        | 0.75 (0.43 to 1.30)                         | 202          | <5          | 12.2 (0.0 to 26.6)                       | n/a <sup>b</sup>                            |
| Rivaroxaban 20+           | 6790         | 107         | 15.9 (12.9 to 18.9)                      | 1.08 (0.85 to 1.37)                         | 844          | 16          | 18.9 (9.5 to 28.2)                       | 1.01 (0.57 to 1.80)                         |
| Apixaban <10              | 1049         | 15          | 9.6 (0.1 to 19.1)                        | 0.68 (0.39 to 1.17)                         | 76           | <5          | 5.6 (0.0 to 16.5)                        | n/a <sup>b</sup>                            |
| Apixaban 10+              | 2091         | 16          | 8.0 (3.7 to 12.3)                        | 0.51 (0.30 to 0.86)                         | 133          | 0           | -                                        | n/a <sup>b</sup>                            |
| <b>Upper GI bleed</b>     |              |             |                                          |                                             |              |             |                                          |                                             |

|                                     |      |     |                        |                      |     |    |                        |                      |
|-------------------------------------|------|-----|------------------------|----------------------|-----|----|------------------------|----------------------|
| Dabigatran <300                     | 613  | 12  | 21.5 (0.0 to 44.2)     | 1.48 (0.82 to 2.66)  | 98  | 0  | -                      | n/a <sup>b</sup>     |
| Dabigatran 300+                     | 488  | <5  | 6.3 (0.0 to 12.5)      | n/a <sup>b</sup>     | 72  | <5 | 101.7 (0.0 to 220.3)   | n/a <sup>b</sup>     |
| Rivaroxaban <20                     | 1001 | 14  | 8.6 (2.8 to 14.4)      | 0.81 (0.47 to 1.40)  | 202 | <5 | 12.1 (0.0 to 26.6)     | n/a <sup>b</sup>     |
| Rivaroxaban 20+                     | 6793 | 98  | 14.6 (11.7 to 17.4)    | 1.07 (0.83 to 1.38)  | 844 | 16 | 18.9 (9.5 to 28.2)     | 1.16 (0.65 to 2.08)  |
| Apixaban <10                        | 1049 | 14  | 9.3 (0.0 to 18.8)      | 0.67 (0.38 to 1.18)  | 76  | <5 | 5.6 (0.0 to 16.5)      | n/a <sup>b</sup>     |
| Apixaban 10+                        | 2093 | 15  | 7.4 (3.3 to 11.6)      | 0.51 (0.29 to 0.87)  | 133 | 0  | -                      | n/a <sup>b</sup>     |
| <b>Ischaemic stroke<sup>c</sup></b> |      |     |                        |                      |     |    |                        |                      |
| Dabigatran <300                     | 408  | 11  | 19.0 (6.8 to 31.2)     | 1.60 (0.86 to 2.96)  | 58  | <5 | 40.5 (0.0 to 95.1)     | n/a <sup>b</sup>     |
| Dabigatran 300+                     | 321  | 8   | 26.7 (0.2 to 53.2)     | 2.19 (1.08 to 4.47)  | 50  | 0  | -                      | n/a <sup>b</sup>     |
| Rivaroxaban <20                     | 778  | 17  | 20.1 (8.7 to 31.5)     | 1.21 (0.72 to 2.02)  | 166 | <5 | 7.0 (0.0 to 16.8)      | n/a <sup>b</sup>     |
| Rivaroxaban 20+                     | 5957 | 60  | 10.2 (7.6 to 12.8)     | 0.87 (0.64 to 1.19)  | 739 | 6  | 7.6 (1.4 to 13.8)      | 0.63 (0.26 to 1.53)  |
| Apixaban <10                        | 708  | 20  | 13.6 (5.8 to 21.5)     | 1.26 (0.77 to 2.07)  | 44  | <5 | 9.4 (0.0 to 27.7)      | n/a <sup>b</sup>     |
| Apixaban 10+                        | 1499 | 23  | 13.7 (8.0 to 19.4)     | 1.08 (0.68 to 1.72)  | 71  | <5 | 24.9 (0.0 to 60.4)     | n/a <sup>b</sup>     |
| <b>VTE<sup>d</sup></b>              |      |     |                        |                      |     |    |                        |                      |
| Dabigatran <300                     | 578  | 6   | 8.4 (1.1 to 15.7)      | 0.10 (0.05 to 0.23)* | 89  | <5 | 46.7 (0.0 to 104.6)    | n/a <sup>b</sup>     |
| Dabigatran 300+                     | 447  | <5  | 6.8 (0.0 to 13.7)      | n/a <sup>b</sup>     | 69  | <5 | 23.5 (0.0 to 57.2)     | n/a <sup>b</sup>     |
| Rivaroxaban <20                     | 801  | 25  | 40.4 (22.2 to 58.5)    | 0.18 (0.12 to 0.28)* | 136 | 28 | 279.2 (166.2 to 392.2) | 1.31 (0.83 to 2.06)  |
| Rivaroxaban 20+                     | 3062 | 657 | 219.2 (202.3 to 236.1) | 1.85 (1.61 to 2.11)* | 370 | 81 | 258.6 (192.0 to 325.3) | 2.19 (1.56 to 3.07)* |
| Apixaban <10                        | 922  | 14  | 20.8 (3.7 to 37.9)     | 0.19 (0.11 to 0.32)* | 67  | <5 | 16.2 (0.0 to 38.8)     | n/a <sup>b</sup>     |
| Apixaban 10+                        | 1722 | 74  | 52.8 (39.8 to 65.9)    | 0.58 (0.45 to 0.75)* | 112 | <5 | 8.1 (0.0 to 24.0)      | n/a <sup>b</sup>     |
| <b>Mortality</b>                    |      |     |                        |                      |     |    |                        |                      |
| Dabigatran <300                     | 615  | 61  | 80.2 (44.1 to 116.3)   | 1.26 (0.97 to 1.63)  | 98  | 13 | 121.8 (27.3 to 216.2)  | 1.92 (1.09 to 3.38)  |
| Dabigatran 300+                     | 489  | 12  | 76.0 (0.0 to 164.3)    | 0.67 (0.38 to 1.18)  | 73  | <5 | 8.7 (0.0 to 25.9)      | n/a <sup>b</sup>     |
| Rivaroxaban <20                     | 1004 | 164 | 115.9 (93.4 to 138.5)  | 1.67 (1.41 to 1.98)* | 203 | 41 | 173.1 (112.0 to 234.1) | 2.39 (1.69 to 3.38)* |
| Rivaroxaban 20+                     | 6827 | 546 | 80.9 (74.1 to 87.7)    | 1.39 (1.24 to 1.55)* | 850 | 75 | 90.6 (69.8 to 111.3)   | 1.46 (1.11 to 1.93)* |
| Apixaban <10                        | 1057 | 175 | 119.6 (88.2 to 151.0)  | 1.33 (1.12 to 1.58)* | 76  | 12 | 94.2 (27.7 to 160.8)   | 1.42 (0.78 to 2.59)  |
| Apixaban 10+                        | 2097 | 128 | 56.9 (46.7 to 67.1)    | 0.99 (0.81 to 1.20)  | 133 | 8  | 84.3 (0.0 to 174.7)    | 1.14 (0.55 to 2.35)  |

<sup>a</sup>) adjusted for age, sex, ethnicity, smoking, alcohol, Townsend quintile, BMI, SPB, falls&hipfracture, hip/knee ops, comorbidities (alcoholism, AF, treated hypertension, CKD, COPD, liver disease, CHD, CCF, any cancer, valvular, peptic ulcer), previous events (bleed, VTE, ischaemic stroke), medications at the baseline (macrolides, antiplatelets, anticonvulsant, corticosteroids, NSAIDs, statin, hormones), study year

<sup>b</sup>) insufficient data for analysis

<sup>c</sup>) based on patients without previous ischaemic stroke

<sup>d</sup>) based on patients without previous VTE

\*) P-value<0.01

eTable 13 All patients: Rates per 1000py of outcomes by drug and dose for DOAC's and adjusted hazard ratios with reference to warfarin in QResearch and CPRD

|                           | QResearch    |                                          |                                             | CPRD         |                                          |                                             |
|---------------------------|--------------|------------------------------------------|---------------------------------------------|--------------|------------------------------------------|---------------------------------------------|
|                           | Person-years | Age-sex adjusted rate per 1000py (95%CI) | Adjusted hazard ratios (95%CI) <sup>a</sup> | Person-years | Age-sex adjusted rate per 1000py (95%CI) | Adjusted hazard ratios (95%CI) <sup>a</sup> |
| <b>Major bleeding</b>     |              |                                          |                                             |              |                                          |                                             |
| Dabigatran <300           | 3031         | 27.6 (19.8 to 35.3)                      | 1.01 (0.81 to 1.24)                         | 581          | 22.1 (6.1 to 38.0)                       | 0.66 (0.38 to 1.15)                         |
| Dabigatran 300+           | 2847         | 25.6 (7.1 to 44.0)                       | 0.77 (0.57 to 1.04)                         | 418          | 54.0 (0.0 to 116.4)                      | 0.84 (0.42 to 1.69)                         |
| Rivaroxaban <20           | 3043         | 35.9 (27.6 to 44.2)                      | 1.17 (0.96 to 1.41)                         | 536          | 40.1 (21.9 to 58.2)                      | 1.26 (0.84 to 1.89)                         |
| Rivaroxaban 20+           | 16587        | 26.6 (24.1 to 29.1)                      | 0.99 (0.89 to 1.11)                         | 2280         | 31.3 (23.8 to 38.8)                      | 1.01 (0.77 to 1.32)                         |
| Apixaban <10              | 3440         | 25.8 (15.8 to 35.7)                      | 0.72 (0.58 to 0.91)*                        | 343          | 34.6 (0.0 to 70.6)                       | 0.69 (0.37 to 1.32)                         |
| Apixaban 10+              | 6832         | 14.2 (11.3 to 17.2)                      | 0.53 (0.43 to 0.66)*                        | 610          | 24.1 (10.6 to 37.6)                      | 0.78 (0.45 to 1.35)                         |
| <b>Intracranial bleed</b> |              |                                          |                                             |              |                                          |                                             |
| Dabigatran <300           | 3080         | 3.3 (1.3 to 5.3)                         | 0.53 (0.31 to 0.90)                         | 586          | 0.9 (0.0 to 2.6)                         | n/a <sup>b</sup>                            |
| Dabigatran 300+           | 2889         | 5.2 (0.0 to 13.7)                        | n/a <sup>b</sup>                            | 421          | 1.3 (0.0 to 3.8)                         | n/a <sup>b</sup>                            |
| Rivaroxaban <20           | 3080         | 10.3 (5.9 to 14.6)                       | 0.97 (0.66 to 1.45)                         | 541          | 8.7 (0.5 to 16.9)                        | 1.15 (0.49 to 2.68)                         |
| Rivaroxaban 20+           | 16771        | 4.1 (3.1 to 5.1)                         | 0.63 (0.48 to 0.83)*                        | 2303         | 4.9 (2.0 to 7.8)                         | 0.85 (0.44 to 1.64)                         |
| Apixaban <10              | 3464         | 3.9 (1.5 to 6.4)                         | 0.59 (0.38 to 0.93)                         | 344          | -                                        | n/a <sup>b</sup>                            |
| Apixaban 10+              | 6863         | 2.8 (1.5 to 4.1)                         | 0.43 (0.27 to 0.70)*                        | 614          | 7.2 (0.0 to 15.1)                        | n/a <sup>b</sup>                            |
| <b>Haematuria</b>         |              |                                          |                                             |              |                                          |                                             |
| Dabigatran <300           | 3052         | 6.9 (3.6 to 10.3)                        | 0.94 (0.62 to 1.43)                         | 583          | 13.0 (0.0 to 27.4)                       | 1.00 (0.41 to 2.44)                         |
| Dabigatran 300+           | 2878         | 7.6 (0.0 to 16.1)                        | 0.76 (0.46 to 1.28)                         | 421          | 1.3 (0.0 to 3.8)                         | n/a <sup>b</sup>                            |
| Rivaroxaban <20           | 3061         | 13.4 (8.1 to 18.7)                       | 1.54 (1.09 to 2.19)                         | 537          | 9.8 (3.0 to 16.6)                        | 1.87 (0.89 to 3.90)                         |
| Rivaroxaban 20+           | 16704        | 7.7 (6.3 to 9.0)                         | 1.04 (0.84 to 1.28)                         | 2293         | 9.2 (5.2 to 13.3)                        | 1.27 (0.76 to 2.13)                         |
| Apixaban <10              | 3459         | 7.1 (1.8 to 12.3)                        | 0.88 (0.56 to 1.37)                         | 343          | 17.6 (0.0 to 47.1)                       | n/a <sup>b</sup>                            |
| Apixaban 10+              | 6856         | 4.0 (2.4 to 5.5)                         | 0.54 (0.36 to 0.81)*                        | 613          | 6.4 (0.0 to 13.1)                        | n/a <sup>b</sup>                            |
| <b>Haemoptysis</b>        |              |                                          |                                             |              |                                          |                                             |
| Dabigatran <300           | 3081         | 1.5 (0.0 to 3.5)                         | n/a <sup>b</sup>                            | 586          | 1.8 (0.0 to 5.4)                         | n/a <sup>b</sup>                            |
| Dabigatran 300+           | 2874         | 1.6 (0.4 to 2.8)                         | 1.67 (0.77 to 3.62)                         | 421          | -                                        | n/a <sup>b</sup>                            |
| Rivaroxaban <20           | 3079         | 1.6 (0.0 to 3.5)                         | 1.10 (0.44 to 2.76)                         | 541          | 6.5 (0.0 to 15.6)                        | n/a <sup>b</sup>                            |
| Rivaroxaban 20+           | 16767        | 1.6 (1.0 to 2.2)                         | 1.05 (0.67 to 1.67)                         | 2303         | 1.8 (0.0 to 3.6)                         | n/a <sup>b</sup>                            |
| Apixaban <10              | 3467         | 3.0 (0.0 to 7.2)                         | n/a <sup>b</sup>                            | 344          | 1.3 (0.0 to 4.0)                         | n/a <sup>b</sup>                            |
| Apixaban 10+              | 6866         | 0.1 (0.0 to 0.3)                         | n/a <sup>b</sup>                            | 614          | -                                        | n/a <sup>b</sup>                            |
| <b>All GI bleed</b>       |              |                                          |                                             |              |                                          |                                             |
| Dabigatran <300           | 3062         | 15.8 (9.5 to 22.2)                       | 1.41 (1.06 to 1.87)                         | 585          | 6.3 (1.0 to 11.6)                        | 0.67 (0.30 to 1.52)                         |

|                                     |       |                     |                      |      |                       |                      |
|-------------------------------------|-------|---------------------|----------------------|------|-----------------------|----------------------|
| Dabigatran 300+                     | 2873  | 11.3 (0.0 to 25.2)  | 0.90 (0.57 to 1.40)  | 419  | 51.7 (0.0 to 114.5)   | 1.48 (0.65 to 3.35)  |
| Rivaroxaban <20                     | 3069  | 11.2 (6.9 to 15.6)  | 1.12 (0.83 to 1.49)  | 540  | 16.1 (4.3 to 27.8)    | 0.99 (0.53 to 1.84)  |
| Rivaroxaban 20+                     | 16683 | 13.3 (11.5 to 15.1) | 1.16 (0.98 to 1.37)  | 2292 | 15.6 (10.3 to 20.9)   | 0.94 (0.64 to 1.37)  |
| Apixaban <10                        | 3453  | 11.5 (4.8 to 18.2)  | 0.69 (0.49 to 0.97)  | 344  | 15.6 (0.0 to 36.2)    | 0.63 (0.25 to 1.56)  |
| Apixaban 10+                        | 6846  | 7.7 (5.5 to 10.0)   | 0.68 (0.51 to 0.92)  | 612  | 10.4 (1.8 to 19.1)    | 0.63 (0.28 to 1.45)  |
| <b>Upper GI bleed</b>               |       |                     |                      |      |                       |                      |
| Dabigatran <300                     | 3062  | 15.3 (9.0 to 21.6)  | 1.48 (1.11 to 1.98)* | 585  | 6.3 (1.0 to 11.6)     | 0.75 (0.33 to 1.68)  |
| Dabigatran 300+                     | 2873  | 11.0 (0.0 to 24.9)  | 0.90 (0.56 to 1.44)  | 419  | 49.9 (0.0 to 112.6)   | 1.37 (0.56 to 3.34)  |
| Rivaroxaban <20                     | 3071  | 10.8 (6.5 to 15.1)  | 1.12 (0.83 to 1.51)  | 540  | 16.1 (4.3 to 27.8)    | 1.08 (0.58 to 2.01)  |
| Rivaroxaban 20+                     | 16693 | 12.4 (10.7 to 14.2) | 1.17 (0.99 to 1.39)  | 2292 | 15.1 (9.9 to 20.2)    | 1.00 (0.67 to 1.48)  |
| Apixaban <10                        | 3453  | 10.6 (4.1 to 17.1)  | 0.67 (0.47 to 0.96)  | 344  | 15.6 (0.0 to 36.2)    | 0.68 (0.27 to 1.69)  |
| Apixaban 10+                        | 6849  | 7.4 (5.2 to 9.5)    | 0.70 (0.51 to 0.95)  | 614  | 8.9 (0.8 to 17.1)     | 0.58 (0.23 to 1.43)  |
| <b>Rectal bleed</b>                 |       |                     |                      |      |                       |                      |
| Dabigatran <300                     | 3080  | 0.5 (0.0 to 1.3)    | n/a <sup>b</sup>     | 587  | -                     | n/a <sup>b</sup>     |
| Dabigatran 300+                     | 2889  | 0.6 (0.0 to 1.2)    | n/a <sup>b</sup>     | 420  | 1.8 (0.0 to 5.3)      | n/a <sup>b</sup>     |
| Rivaroxaban <20                     | 3081  | 0.4 (0.0 to 0.9)    | n/a <sup>b</sup>     | 542  | -                     | n/a <sup>b</sup>     |
| Rivaroxaban 20+                     | 16770 | 0.9 (0.4 to 1.3)    | 1.00 (0.55 to 1.83)  | 2303 | 0.5 (0.0 to 1.5)      | n/a <sup>b</sup>     |
| Apixaban <10                        | 3467  | 1.1 (0.0 to 2.6)    | n/a                  | 344  | -                     | n/a <sup>b</sup>     |
| Apixaban 10+                        | 6863  | 0.4 (0.0 to 0.8)    | n/a                  | 613  | 1.5 (0.0 to 4.3)      | n/a <sup>b</sup>     |
| <b>Ischaemic stroke<sup>c</sup></b> |       |                     |                      |      |                       |                      |
| Dabigatran <300                     | 2095  | 16.0 (10.4 to 21.5) | 1.18 (0.87 to 1.61)  | 385  | 15.6 (3.4 to 27.7)    | 1.10 (0.54 to 2.23)  |
| Dabigatran 300+                     | 2210  | 17.1 (4.5 to 29.7)  | 1.52 (1.07 to 2.15)  | 325  | 3.7 (0.0 to 8.9)      | n/a <sup>b</sup>     |
| Rivaroxaban <20                     | 2338  | 20.4 (12.7 to 28.0) | 1.11 (0.83 to 1.50)  | 397  | 21.1 (7.9 to 34.2)    | 1.40 (0.77 to 2.57)  |
| Rivaroxaban 20+                     | 14183 | 11.0 (9.2 to 12.8)  | 0.88 (0.73 to 1.06)  | 1886 | 15.5 (9.8 to 21.2)    | 1.08 (0.71 to 1.65)  |
| Apixaban <10                        | 2383  | 16.9 (9.5 to 24.4)  | 1.17 (0.87 to 1.57)  | 218  | 14.4 (0.0 to 30.5)    | 0.96 (0.38 to 2.39)  |
| Apixaban 10+                        | 5176  | 12.4 (9.4 to 15.5)  | 1.07 (0.82 to 1.40)  | 412  | 22.0 (4.1 to 39.9)    | 1.14 (0.52 to 2.49)  |
| <b>VTE<sup>d</sup></b>              |       |                     |                      |      |                       |                      |
| Dabigatran <300                     | 2933  | 3.2 (0.6 to 5.9)    | 0.14 (0.07 to 0.28)* | 550  | 6.8 (0.0 to 14.8)     | n/a <sup>b</sup>     |
| Dabigatran 300+                     | 2799  | 1.5 (0.4 to 2.7)    | 0.25 (0.12 to 0.52)* | 397  | 6.3 (0.0 to 13.7)     | n/a <sup>b</sup>     |
| Rivaroxaban <20                     | 2761  | 17.9 (10.0 to 25.8) | 0.24 (0.17 to 0.35)* | 441  | 113.1 (67.3 to 158.9) | 1.39 (0.91 to 2.12)  |
| Rivaroxaban 20+                     | 12506 | 55.6 (51.5 to 59.7) | 1.92 (1.70 to 2.18)* | 1728 | 54.0 (42.4 to 65.6)   | 2.04 (1.50 to 2.76)* |
| Apixaban <10                        | 3234  | 11.5 (3.2 to 19.8)  | 0.26 (0.17 to 0.40)* | 316  | 9.7 (0.0 to 21.8)     | n/a <sup>b</sup>     |
| Apixaban 10+                        | 6328  | 14.8 (11.5 to 18.2) | 0.60 (0.47 to 0.76)* | 565  | 7.5 (0.0 to 15.3)     | n/a <sup>b</sup>     |
| <b>Mortality</b>                    |       |                     |                      |      |                       |                      |
| Dabigatran <300                     | 3081  | 53.1 (42.1 to 64.2) | 1.12 (0.97 to 1.28)  | 587  | 59.2 (36.1 to 82.4)   | 1.14 (0.82 to 1.58)  |

|                 |       |                      |                      |      |                       |                      |
|-----------------|-------|----------------------|----------------------|------|-----------------------|----------------------|
| Dabigatran 300+ | 2889  | 68.2 (20.8 to 115.6) | 0.72 (0.55 to 0.95)  | 421  | 20.9 (8.6 to 33.3)    | 1.27 (0.72 to 2.25)  |
| Rivaroxaban <20 | 3083  | 96.6 (83.4 to 109.8) | 1.45 (1.30 to 1.62)* | 542  | 126.6 (91.3 to 161.8) | 1.78 (1.40 to 2.27)* |
| Rivaroxaban 20+ | 16780 | 61.5 (57.6 to 65.3)  | 1.24 (1.15 to 1.34)* | 2304 | 60.1 (49.9 to 70.3)   | 1.23 (1.01 to 1.50)  |
| Apixaban <10    | 3467  | 97.1 (81.1 to 113.2) | 1.28 (1.15 to 1.42)* | 344  | 105.9 (56.4 to 155.5) | 1.63 (1.20 to 2.21)* |
| Apixaban 10+    | 6867  | 47.4 (41.8 to 53.0)  | 0.97 (0.86 to 1.10)  | 614  | 45.3 (27.1 to 63.5)   | 1.05 (0.70 to 1.57)  |

<sup>a</sup>) adjusted for age, sex, ethnicity, smoking, alcohol, Townsend quintile, BMI, SPB, falls&hipfracture, hip/knee ops, comorbidities (alcoholism, AF, treated hypertension, CKD, COPD, liver disease, CHD, CCF, any cancer, valvular, peptic ulcer), previous events (bleed, VTE, ischaemic stroke), medications at the baseline (macrolides, antiplatelets, anticonvulsant, corticosteroids, NSAIDs, statin, hormones), study year

<sup>b</sup>) insufficient data for analysis

<sup>c</sup>) based on patients without previous ischaemic stroke

<sup>d</sup>) based on patients without previous VTE

\*) P-value<0.01



eTable 14 All patients: Sensitivity analysis, censoring patients at the time of hospitalisation related to other outcome. Adjusted hazard ratios (95% CI) for outcomes associated with exposure to study drugs compared with warfarin.

| Comparison with warfarin  | QResearch           |         | CPRD                |         | Both databases               |         |
|---------------------------|---------------------|---------|---------------------|---------|------------------------------|---------|
|                           | Adjusted HR (95%CI) | P-value | Adjusted HR (95%CI) | P-value | Combined analysis HR (95%CI) | P-value |
| <b>Major bleeding</b>     |                     |         |                     |         |                              |         |
| Dabigatran                | 0.92 (0.77 to 1.09) | 0.3     | 0.75 (0.49 to 1.14) | 0.2     | 0.89 (0.76 to 1.04)          | 0.1     |
| Rivaroxaban               | 1.04 (0.94 to 1.15) | 0.5     | 1.15 (0.92 to 1.45) | 0.2     | 1.05 (0.96 to 1.16)          | 0.3     |
| Apixaban                  | 0.60 (0.51 to 0.71) | <0.001  | 0.76 (0.50 to 1.15) | 0.2     | 0.62 (0.53 to 0.72)          | <0.001  |
| <b>Intracranial bleed</b> |                     |         |                     |         |                              |         |
| Dabigatran                | 0.43 (0.27 to 0.70) | <0.001  | 0.29 (0.07 to 1.17) | 0.08    | 0.41 (0.26 to 0.65)          | <0.001  |
| Rivaroxaban               | 0.68 (0.54 to 0.87) | 0.002   | 1.03 (0.61 to 1.74) | 0.9     | 0.73 (0.58 to 0.91)          | 0.005   |
| Apixaban                  | 0.46 (0.32 to 0.66) | <0.001  | 0.58 (0.21 to 1.65) | 0.3     | 0.47 (0.34 to 0.66)          | <0.001  |
| <b>Haematuria</b>         |                     |         |                     |         |                              |         |
| Dabigatran                | 0.91 (0.66 to 1.25) | 0.6     | 0.92 (0.45 to 1.88) | 0.8     | 0.91 (0.68 to 1.21)          | 0.5     |
| Rivaroxaban               | 1.15 (0.95 to 1.39) | 0.2     | 1.52 (0.99 to 2.34) | 0.06    | 1.20 (1.00 to 1.42)          | 0.05    |
| Apixaban                  | 0.67 (0.49 to 0.91) | 0.01    | 1.18 (0.57 to 2.44) | 0.7     | 0.73 (0.55 to 0.97)          | 0.03    |
| <b>Haemoptysis</b>        |                     |         |                     |         |                              |         |
| Dabigatran                | 1.23 (0.64 to 2.36) | 0.5     | 0.75 (0.10 to 5.58) | 0.8     | 1.17 (0.63 to 2.17)          | 0.6     |
| Rivaroxaban               | 1.14 (0.74 to 1.74) | 0.6     | 1.46 (0.53 to 3.99) | 0.5     | 1.17 (0.79 to 1.72)          | 0.4     |
| Apixaban                  | 0.33 (0.13 to 0.85) | 0.02    | 0.95 (0.12 to 7.60) | 1       | 0.39 (0.17 to 0.92)          | 0.03    |
| <b>All GI bleed</b>       |                     |         |                     |         |                              |         |
| Dabigatran                | 1.18 (0.93 to 1.51) | 0.2     | 0.88 (0.49 to 1.58) | 0.7     | 1.13 (0.90 to 1.42)          | 0.3     |
| Rivaroxaban               | 1.16 (1.00 to 1.35) | 0.06    | 1.01 (0.72 to 1.40) | 1       | 1.13 (0.99 to 1.30)          | 0.07    |
| Apixaban                  | 0.67 (0.53 to 0.85) | 0.001   | 0.62 (0.33 to 1.17) | 0.1     | 0.66 (0.53 to 0.83)          | <0.001  |
| <b>Upper GI bleed</b>     |                     |         |                     |         |                              |         |
| Dabigatran                | 1.21 (0.94 to 1.56) | 0.1     | 0.90 (0.49 to 1.66) | 0.7     | 1.16 (0.91 to 1.46)          | 0.2     |
| Rivaroxaban               | 1.18 (1.01 to 1.38) | 0.04    | 1.08 (0.77 to 1.52) | 0.6     | 1.17 (1.01 to 1.35)          | 0.03    |
| Apixaban                  | 0.67 (0.52 to 0.85) | 0.001   | 0.62 (0.32 to 1.20) | 0.2     | 0.66 (0.52 to 0.83)          | <0.001  |
| <b>Rectal bleed</b>       |                     |         |                     |         |                              |         |
| Dabigatran                | 0.98 (0.39 to 2.42) | 1       | 0.70 (0.09 to 5.26) | 0.7     | 0.92 (0.40 to 2.11)          | 0.8     |
| Rivaroxaban               | 0.95 (0.53 to 1.73) | 0.9     | 0.23 (0.03 to 1.81) | 0.2     | 0.86 (0.48 to 1.51)          | 0.6     |
| Apixaban                  | 0.87 (0.37 to 2.04) | 0.7     | 0.64 (0.08 to 5.26) | 0.7     | 0.82 (0.37 to 1.82)          | 0.6     |
| <b>Ischaemic stroke</b>   |                     |         |                     |         |                              |         |
| Dabigatran                | 1.31 (1.03 to 1.66) | 0.03    | 0.89 (0.47 to 1.69) | 0.7     | 1.25 (1.00 to 1.56)          | 0.05    |
| Rivaroxaban               | 0.94 (0.79 to 1.11) | 0.5     | 1.04 (0.71 to 1.53) | 0.8     | 0.97 (0.83 to 1.13)          | 0.7     |
| Apixaban                  | 1.16 (0.94 to 1.43) | 0.2     | 1.02 (0.55 to 1.90) | 0.9     | 1.14 (0.94 to 1.39)          | 0.2     |
| <b>VTE</b>                |                     |         |                     |         |                              |         |
| Dabigatran                | 0.20 (0.12 to 0.34) | <0.001  | 0.50 (0.23 to 1.07) | 0.07    | 0.26 (0.17 to 0.40)          | <0.001  |
| Rivaroxaban               | 1.50 (1.33 to 1.70) | <0.001  | 1.88 (1.42 to 2.48) | <0.001  | 1.55 (1.39 to 1.74)          | <0.001  |
| Apixaban                  | 0.46 (0.37 to 0.57) | <0.001  | 0.50 (0.24 to 1.03) | 0.06    | 0.46 (0.37 to 0.57)          | <0.001  |
| <b>Mortality</b>          |                     |         |                     |         |                              |         |
| Dabigatran                | 1.02 (0.90 to 1.16) | 0.7     | 1.16 (0.87 to 1.53) | 0.3     | 1.04 (0.92 to 1.16)          | 0.5     |
| Rivaroxaban               | 1.34 (1.25 to 1.43) | <0.001  | 1.46 (1.24 to 1.71) | <0.001  | 1.36 (1.27 to 1.44)          | <0.001  |
| Apixaban                  | 1.13 (1.03 to 1.24) | 0.009   | 1.36 (1.06 to 1.76) | 0.02    | 1.16 (1.06 to 1.26)          | <0.001  |

\*) adjusted for age, sex, ethnicity, smoking, alcohol, Townsend quintile, BMI, SPB, falls&hipfracture, hip/knee ops, comorbidities (alcoholism, AF, treated hypertension, CKD, COPD, liver disease, CHD, CCF, any cancer, valvular, peptic ulcer), previous events (bleed, VTE, ischaemic stroke), medications at the baseline (macrolides, antiplatelets, anticonvulsant, corticosteroids, NSAIDs, statin, hormones), study year

eTable 15 All patients: Complete case analysis and propensity score adjustment by database. Adjusted hazard ratios (95% CI) for outcomes associated with exposure to study drugs compared with warfarin.

| Comparison with warfarin  | QResearch                           |                              | CPRD                               |                              |
|---------------------------|-------------------------------------|------------------------------|------------------------------------|------------------------------|
|                           | Complete case analysis* (N=141,760) | Propensity score adjustment# | Complete case analysis* (N=36,465) | Propensity score adjustment† |
| <b>Major bleeding</b>     |                                     |                              |                                    |                              |
| Dabigatran                | 0.93 (0.78 to 1.11)                 | 0.87 (0.73 to 1.04)          | 0.79 (0.52 to 1.22)                | 0.72 (0.47 to 1.12)          |
| Rivaroxaban               | 1.03 (0.92 to 1.14)                 | 0.97 (0.88 to 1.06)          | 1.15 (0.90 to 1.46)                | 1.03 (0.83 to 1.28)          |
| Apixaban                  | 0.60 (0.51 to 0.71)                 | 0.60 (0.51 to 0.70)          | 0.74 (0.47 to 1.14)                | 0.71 (0.47 to 1.07)          |
| <b>Intracranial bleed</b> |                                     |                              |                                    |                              |
| Dabigatran                | 0.46 (0.28 to 0.75)                 | 0.50 (0.31 to 0.80)          | 0.31 (0.08 to 1.25)                | 0.24 (0.04 to 1.43)          |
| Rivaroxaban               | 0.66 (0.51 to 0.85)                 | 0.67 (0.53 to 0.85)          | 0.96 (0.55 to 1.67)                | 0.89 (0.54 to 1.48)          |
| Apixaban                  | 0.42 (0.29 to 0.62)                 | 0.51 (0.36 to 0.72)          | 0.59 (0.21 to 1.66)                | 0.52 (0.19 to 1.43)          |
| <b>Haematuria</b>         |                                     |                              |                                    |                              |
| Dabigatran                | 0.89 (0.64 to 1.25)                 | 0.78 (0.56 to 1.08)          | 1.06 (0.51 to 2.16)                | 0.87 (0.42 to 1.81)          |
| Rivaroxaban               | 1.17 (0.96 to 1.42)                 | 0.94 (0.79 to 1.12)          | 1.56 (0.98 to 2.47)                | 0.89 (0.58 to 1.38)          |
| Apixaban                  | 0.67 (0.48 to 0.92)                 | 0.51 (0.38 to 0.69)          | 1.06 (0.47 to 2.38)                | 0.71 (0.33 to 1.53)          |
| <b>Haemoptysis</b>        |                                     |                              |                                    |                              |
| Dabigatran                | 1.24 (0.65 to 2.39)                 | 1.09 (0.56 to 2.13)          | 0.88 (0.12 to 6.56)                | 0.59 (0.08 to 4.42)          |
| Rivaroxaban               | 0.97 (0.62 to 1.52)                 | 0.88 (0.58 to 1.33)          | 1.29 (0.44 to 3.76)                | 0.89 (0.31 to 2.57)          |
| Apixaban                  | 0.34 (0.13 to 0.88)                 | 0.30 (0.12 to 0.73)          | 1.01 (0.13 to 8.14)                | 0.65 (0.08 to 5.05)          |
| <b>All GI bleed</b>       |                                     |                              |                                    |                              |
| Dabigatran                | 1.23 (0.96 to 1.58)                 | 1.14 (0.89 to 1.45)          | 0.87 (0.47 to 1.60)                | 0.80 (0.42 to 1.52)          |
| Rivaroxaban               | 1.17 (1.00 to 1.37)                 | 1.19 (1.03 to 1.37)          | 1.01 (0.72 to 1.43)                | 1.14 (0.84 to 1.55)          |
| Apixaban                  | 0.71 (0.56 to 0.91)                 | 0.77 (0.62 to 0.96)          | 0.63 (0.33 to 1.18)                | 0.75 (0.41 to 1.37)          |
| <b>Upper GI bleed</b>     |                                     |                              |                                    |                              |
| Dabigatran                | 1.27 (0.98 to 1.65)                 | 1.20 (0.93 to 1.55)          | 0.87 (0.46 to 1.64)                | 0.82 (0.42 to 1.57)          |
| Rivaroxaban               | 1.18 (1.00 to 1.39)                 | 1.24 (1.07 to 1.44)          | 1.08 (0.76 to 1.53)                | 1.23 (0.90 to 1.68)          |
| Apixaban                  | 0.72 (0.56 to 0.92)                 | 0.81 (0.64 to 1.02)          | 0.61 (0.31 to 1.18)                | 0.74 (0.40 to 1.40)          |
| <b>Rectal bleed</b>       |                                     |                              |                                    |                              |
| Dabigatran                | 0.91 (0.37 to 2.26)                 | 0.69 (0.28 to 1.70)          | 0.88 (0.12 to 6.68)                | 0.13 (0.00 to 10.41)         |
| Rivaroxaban               | 1.02 (0.58 to 1.78)                 | 0.72 (0.43 to 1.19)          | 0.27 (0.03 to 2.17)                | 0.23 (0.03 to 1.70)          |
| Apixaban                  | 0.79 (0.34 to 1.85)                 | 0.50 (0.23 to 1.09)          | 0.81 (0.10 to 6.79)                | 0.71 (0.09 to 5.38)          |
| <b>Ischaemic stroke</b>   |                                     |                              |                                    |                              |
| Dabigatran                | 1.29 (1.01 to 1.65)                 | 1.32 (1.04 to 1.68)          | 0.76 (0.38 to 1.56)                | 0.65 (0.25 to 1.65)          |
| Rivaroxaban               | 0.93 (0.79 to 1.11)                 | 0.85 (0.72 to 0.99)          | 1.07 (0.72 to 1.58)                | 1.02 (0.72 to 1.44)          |
| Apixaban                  | 1.16 (0.93 to 1.44)                 | 1.10 (0.91 to 1.33)          | 0.98 (0.52 to 1.88)                | 1.02 (0.55 to 1.89)          |
| <b>VTE</b>                |                                     |                              |                                    |                              |
| Dabigatran                | 0.20 (0.12 to 0.34)                 | 0.21 (0.12 to 0.36)          | 0.48 (0.21 to 1.10)                | 0.45 (0.16 to 1.32)          |
| Rivaroxaban               | 1.51 (1.32 to 1.72)                 | 2.41 (2.17 to 2.67)          | 1.85 (1.37 to 2.52)                | 2.26 (1.70 to 3.00)          |
| Apixaban                  | 0.44 (0.35 to 0.56)                 | 0.59 (0.47 to 0.73)          | 0.43 (0.19 to 0.99)                | 0.38 (0.16 to 0.89)          |
| <b>Mortality</b>          |                                     |                              |                                    |                              |
| Dabigatran                | 1.00 (0.88 to 1.14)                 | 0.93 (0.82 to 1.06)          | 1.02 (0.74 to 1.39)                | 0.93 (0.68 to 1.27)          |
| Rivaroxaban               | 1.30 (1.22 to 1.40)                 | 1.37 (1.29 to 1.46)          | 1.44 (1.22 to 1.70)                | 1.59 (1.38 to 1.84)          |
| Apixaban                  | 1.12 (1.02 to 1.23)                 | 1.34 (1.24 to 1.46)          | 1.40 (1.08 to 1.81)                | 1.52 (1.20 to 1.93)          |

\*) adjusted for age, sex, ethnicity, smoking, alcohol, Townsend quintile, BMI, SPB, falls&hipfracture, hip/knee ops, comorbidities (alcoholism, AF, treated hypertension, CKD, COPD, liver disease, CHD, CCF, any cancer, valvular, peptic ulcer), previous events (bleed, VTE, ischaemic stroke), medications at the baseline (macrolides, antiplatelets, anticonvulsant, corticosteroids, NSAIDs, statin, hormones), study year

\*) based on 5,832 dabigatran users compared to 91,917 warfarin users; 28,652 rivaroxaban users compared to 87,108 warfarin users; 15,012 apixaban users compared to 86,233 warfarin users.

†) based on 1,144 dabigatran users compared to 26,693 warfarin users; 4,981 rivaroxaban users compared to 24,607 warfarin users; 1,664 apixaban users compared to 21,824 warfarin users.
